1 **TITLE:** Distinct progenitor populations mediate regeneration in the zebrafish lateral line.

2

3 **AUTHORS**

4 Eric D. Thomas<sup>1,2</sup>, David W. Raible<sup>1,2,3\*</sup>

5 1. Department of Biological Structure

6 2. Graduate Program in Neuroscience

7 3. Virginia Merrill Bloedel Hearing Research Center

8 University of Washington, 1959 NE Pacific St, Box 357420, Seattle, WA 98195, USA

9 Correspondence: [draible@uw.edu](mailto:draible@uw.edu)

10

11 **ABSTRACT**

12       Mechanosensory hair cells of the zebrafish lateral line regenerate rapidly following  
13 damage. These renewed hair cells arise from the proliferation of surrounding support cells,  
14 which undergo symmetric division to produce two hair cell daughters. Given the continued  
15 regenerative capacity of the lateral line, support cells presumably have the ability to replenish  
16 themselves. Utilizing novel transgenic lines, we identified support cell populations with distinct  
17 progenitor identities. These populations show differences in their ability to generate new hair  
18 cells during homeostasis and regeneration. Targeted ablation of support cells reduced the number  
19 of regenerated hair cells. Furthermore, progenitors regenerated after targeted support cell  
20 ablation in the absence of hair cell damage. We also determined that distinct support cell  
21 populations are independently regulated by Notch signaling. The existence of independent  
22 progenitor populations could provide flexibility for the continued generation of new hair cells  
23 under a variety of conditions throughout the life of the animal.

24

25 **INTRODUCTION**

26       The regenerative potential of a given tissue is dependent on the availability of progenitor  
27 cells that are able to functionally replace lost or damaged cells within that tissue. For instance,  
28 bulge cells in the hair follicle can repair the surrounding epidermis (Rompolas and Greco 2014;  
29 Hsu, Li, and Fuchs 2014), new intestinal epithelial cells arise from crypt cells (Santos et al. 2018;  
30 Yousefi, Li, and Lengner 2017), and horizontal and globose basal cells can regenerate cells in the  
31 olfactory epithelium (Choi and Goldstein 2018; Schwob et al. 2017). Depletion of these

32 progenitors can severely diminish the regenerative capacity of the tissue, and tissues that lack a  
33 progenitor pool altogether are unable to regenerate. To gain further insight into how different  
34 tissues regenerate, a greater understanding of the mechanisms that define and regulate progenitor  
35 function are needed.

36 The zebrafish lateral line system has long been recognized as an excellent model for  
37 studying regeneration. The sensory organ of the lateral line, the neuromast, is comprised of  
38 mechanosensory hair cells organized on the surface of the head and body (Thomas et al. 2015).  
39 Lateral line hair cells regenerate rapidly following damage, with the system returning to  
40 quiescence after regeneration is complete (Harris et al. 2003; Hernandez et al., 2007; Ma et al.,  
41 2008). The surrounding nonsensory support cells serve as progenitors for new hair cells. This  
42 replenishment is proliferation-dependent and occurs symmetrically, with each progenitor  
43 dividing to give rise to two daughter hair cells (Wibowo et al. 2011; Mackenzie and Raible 2012;  
44 López-Schier and Hudspeth 2006; Romero-Carvajal et al. 2015). Three key observations of  
45 support cell behavior during regeneration suggest that different support cell populations may be  
46 differentially regulated in response to regeneration. First, the support cell proliferation that  
47 follows hair cell death occurs mainly in the dorsal and ventral compartments of the neuromast  
48 (Romero-Carvajal et al. 2015), indicating that progenitor identity is spatially regulated. The most  
49 peripheral support cells, often called mantle cells, do not proliferate in response to hair cell  
50 damage (Ma, Rubel, and Raible 2008; Romero-Carvajal et al. 2015). Second, the regenerative  
51 capacity of the neuromast is not diminished over multiple regenerations (Cruz et al. 2015; Pinto-  
52 Teixeira et al. 2015), indicating that progenitor cells must also be replaced in addition to hair  
53 cells. Finally, in addition to regeneration in response to acute damage, lateral line hair cells  
54 undergo turnover and replacement under homeostatic conditions (Cruz et al. 2015; Williams and  
55 Holder 2000). However, it remains unknown whether there are distinct support cell populations  
56 within the neuromast (e.g. hair cell progenitors and those that replenish progenitors), as well as  
57 how progenitor populations are regulated.

58 In this study, we have used CRISPR to generate novel transgenic lines in which distinct,  
59 spatially segregated populations of support cells are labeled *in vivo*. Fate mapping studies using  
60 these lines show that these populations are functionally distinct with respect to their ability to  
61 contribute new hair cells during homeostasis and to generate hair cells after damage. We also  
62 show that targeted ablation of one of these populations significantly reduces hair cell

63 regeneration. Other fate mapping studies show that these support cell populations can replenish  
64 each other in the absence of hair cell damage. Finally, we show that Notch signaling  
65 differentially regulates these populations. These results demonstrate that there are a number of  
66 distinct progenitor populations within lateral line neuromasts that are independently regulated,  
67 providing flexibility for hair cell replacement under a variety of circumstances.

68

## 69 **RESULTS**

### 70 *Hair Cell Progenitors are Replenished via Proliferation of Other Support Cells*

71 Previous studies have shown that the majority of support cell proliferation occurs during  
72 the first twenty-four hours following hair cell death (Ma, Rubel, and Raible 2008). We replicated  
73 this finding by administering a pulse of F-ara-EdU (EdU), which has been shown to be far less  
74 toxic than BrdU (Neef and Luedtke 2011). The EdU pulse was administered for twenty-four  
75 hours following neomycin-induced hair cell ablation at 5 days post fertilization (5 dpf) and  
76 neuromasts were imaged at seventy-two hours post treatment (72 hpt), the time at which  
77 regeneration is nearly complete (Fig. 1A). In neomycin-treated larvae, roughly 78% of  
78 regenerated hair cells were EdU-positive, compared to 6% in mock-treated larvae (Fig. 1B-C;  $p$   
79  $< 0.0001$ ). We noticed that at the same timepoint that 28% of EdU-positive cells remained  
80 support cells (Fig. 1E, 1B arrowheads). We hypothesized that these cells may represent hair cell  
81 progenitors that had been replaced via proliferation. If so, then these EdU-positive cells should  
82 have the capacity to generate a new round of hair cells after subsequent damage. In order to test  
83 this, we subjected larvae to two rounds of hair cell ablation and regeneration. EdU was  
84 administered for 24h following the first ablation, and BrdU was administered for the same  
85 duration following the second ablation (Fig. 1F). We observed hair cells after the second  
86 regeneration that were both EdU- and BrdU-positive (Fig. 1G-J, arrowheads), indicating that  
87 support cells that divide after the first ablation can in fact serve as hair cell progenitors after  
88 subsequent damage. However, we also observed double-positive cells that remained support cells  
89 (Fig. 1K-N, arrowheads), as well as support cells that were only labeled by EdU (Fig. 1G-N,  
90 asterisks). These observations indicate that support cells that divided after the first round of  
91 damage do not always serve as hair cell progenitors (or even as progenitors at all). Altogether,  
92 these data provide evidence of proliferation-mediated replenishment of hair cell progenitors by

93 support cells in the neuromast, but also suggest that new hair cells arise from a pool of  
94 progenitors that are not strictly defined by their proliferation history.

95

### 96 *Different Progenitor Identities Among Distinct Support Cell Populations*

97 We next sought to determine whether hair cell progenitors could be defined via gene  
98 expression. To this end, we employed CRISPR-mediated transgenesis (Kimura et al. 2014; Ota et  
99 al. 2016) to target genes that label positionally-defined subsets of support cells *in vivo*. These  
100 efforts were part of a broader insertional screen to be described elsewhere. We targeted the  
101 expression of a nuclear-localized form of the protein Eos (nlsEos) to a variety of genetic loci,  
102 and identified three genes (*sfrp1a*, *tnfsf10l3*, and *sost*) which have markedly different expression  
103 patterns within support cells: *sfrp1a* is restricted to the most peripheral support cells (Peripheral  
104 cells; Fig. 2A); *tnfsf10l3* is more broadly expressed throughout the periphery but is enriched in  
105 anteroposterior support cells (AP cells; Fig. 2C); and *sost* is limited to the dorsal and ventral  
106 support cells (DV cells; Fig. 2E). We generated stable transgenic lines for all three loci:  
107 Tg[*sfrp1a*:nlsEos]<sup>w217</sup>; Tg[*tnfsf10l3*:nlsEos]<sup>w218</sup>; and Tg[*sost*:nlsEos]<sup>w215</sup> (hereafter known as  
108 *sfrp1a*:nlsEos, *tnfsf10l3*:nlsEos, and *sost*:nlsEos, respectively). Eos is a photoconvertible protein  
109 that switches from green to red fluorescence (shown in magenta throughout this paper) after  
110 exposure to UV light (Wiedenmann et al. 2004). The converted protein is stable for months. Its  
111 nuclear localization presumably protects it from degradative elements in the cytoplasm, allowing  
112 for a more permanent label than a standard fluorescent reporter (Cruz et al. 2015; McMenamin et  
113 al. 2014). We could thus chase this label from support cell to hair cell if these cells serve as hair  
114 cell progenitors, as hair cells that derived from these support cells would have converted Eos in  
115 their nuclei. To ensure that these genes were not actually expressed in hair cells, we also  
116 generated GFP lines for each gene. We did not observe GFP labeling in hair cells in stable lines  
117 (Fig. 2 – figure supplement 1).

118 We first examined how these different support cell populations contributed to hair cell  
119 development and turnover under homeostatic conditions. All three nlsEos lines were crossed to a  
120 hair cell-specific transgenic line (Tg[Brn3c:GAP43-GFP]<sup>s356t</sup> (Xiao et al. 2005), hereafter known  
121 as brn3c:GFP) in order to distinguish hair cell nuclei. Eos in support cells was photoconverted at  
122 5 dpf and larvae were fixed and immunostained for GFP either immediately or at 8 dpf. At 5 dpf,  
123 19% of hair cells were labeled with Eos expressed by the Peripheral cell transgene, and this

124 number remained the same by 8 dpf (Fig. 2B;  $p = 0.7047$ ). Eos from the AP cell transgene  
125 labeled about 6% of hair cells at both 5 and 8 dpf (Fig. 2D;  $p = 0.9668$ ). Since there is no change  
126 over the three-day span, neither of these populations are responsible for generating new hair cells  
127 under homeostatic conditions. In contrast, the amount of hair cells labeled with photoconverted  
128 Eos from the DV cell transgene increased from 39% to 56% over that three-day span (Fig. 2F;  $p$   
129  $< 0.0001$ ). Thus, the DV cell population seems to be predominantly involved in ongoing hair cell  
130 generation during homeostasis.

131 We next used these transgenic lines to determine whether there was any functional  
132 difference between these support cell subpopulations regarding their ability to serve as hair cell  
133 progenitors during regeneration. Each of the nlsEos lines were once again crossed to *brn3c:GFP*  
134 fish in order to distinguish hair cell nuclei. Eos in support cells was photoconverted at 5 dpf, and  
135 larvae were subjected to neomycin-induced hair cell ablation and then fixed and immunostained  
136 for GFP at 72 hpt (Fig. 3A). Only 4% of regenerated hair cells were derived from the Peripheral  
137 cell population, whereas the AP cell and DV cell populations contributed significantly more,  
138 generating 20% and 61% of regenerated hair cells, respectively (Fig. 3B-D, arrowheads; Fig. 3E;  
139  $p = 0.003$  [Peripheral vs. AP],  $p < 0.0001$  [Peripheral/AP vs. DV]). In order to ensure that this  
140 difference in Eos incorporation was not simply due to relative proportion of available Eos-  
141 positive support cells, we counted the number of Eos-positive support cells in each transgenic  
142 line at 5 dpf, prior to hair cell ablation. There were about half as many Peripheral cells relative to  
143 the other two populations, but no significant difference between the number of AP cells and the  
144 number of DV cells (Fig. 3F; Peripheral =  $14.30 \pm 4.17$ ; AP =  $22.8 \pm 4.40$ ; DV =  $23.86 \pm 4.45$ ;  $p$   
145  $< 0.0001$  [Peripheral vs. AP/DV],  $p > 0.9999$  [AP vs. DV]). Thus, the difference in regenerative  
146 capacity between these populations is not simply a reflection of the number of available cells, but  
147 rather of differences in the progenitor identity of the populations.

148

#### 149 *Inhibition of Notch Signaling Differentially Impacts Support Cell Subpopulations*

150 Notch-mediated lateral inhibition plays a crucial role in ensuring the proper number of  
151 hair cells are regenerated, and inhibition of Notch signaling following hair cell damage  
152 dramatically increases the number of regenerated hair cells (Ma, Rubel, and Raible 2008;  
153 Wibowo et al. 2011; Romero-Carvajal et al. 2015). Thus, we examined how Notch inhibition  
154 impacted the progenitor function of our three support cell populations. We crossed all of our

155 nlsEos lines to the *brn3c*:GFP line, and treated double-positive larvae with 50  $\mu$ M LY411575  
156 (LY), a potent  $\gamma$ -secretase inhibitor (Mizutari et al. 2013; Romero-Carvajal et al. 2015), for 24  
157 hours immediately following neomycin treatment. Fish were fixed at 72 hpt and immunostained  
158 for GFP. In all three lines, after Notch inhibition (Neo/LY) there were roughly twice as many  
159 hair cells as control fish (Neo) (Fig. 4A-B, E-F, I-J;  $p < 0.0001$  [all lines]), consistent with  
160 previous studies. The small number of Peripheral cell-derived hair cells was no different between  
161 LY-treated fish and non-treated fish (Fig. 4C;  $0.62 \pm 1.28$  [Neo] vs.  $1.15 \pm 2.16$  [Neo/LY];  $p =$   
162  $0.2481$ ). By contrast, the number of nlsEos-positive hair cells from both AP and DV cells  
163 increased in fish treated with LY. Moreover, while the number of nlsEos-positive hair cells  
164 derived from DV cells doubled in LY-treated fish (Fig. 4K;  $7.40 \pm 2.13$  [Neo] vs.  $15.25 \pm 6.36$   
165 [Neo/LY];  $p < 0.0001$ ), those derived from AP cells increased roughly five-fold (Fig. 4G;  $2.22 \pm$   
166  $1.94$  [Neo] vs.  $11.38 \pm 4.23$  [Neo/LY];  $p < 0.0001$ ). As a consequence, the percentage of hair  
167 cells derived from DV cells decreased correspondingly (Fig. 4L;  $67.86 \pm 14.63$  [Neo] vs.  $54.69 \pm$   
168  $14.01$  [Neo/LY];  $p < 0.0001$ ), whereas those derived from AP cells doubled (Fig. 4H;  $25.19 \pm$   
169  $21.72$  [Neo] vs.  $50.68 \pm 19.23$  [Neo/LY];  $p < 0.0001$ ). These data suggest that generation of hair  
170 cells from both the AP and DV populations is regulated by Notch signaling (with the AP  
171 population being regulated to a greater extent), whereas Peripheral cells are not responsive to  
172 Notch signaling.

173

#### 174 *Selective Ablation of DV Cells Reduces Hair Cell Regeneration*

175 Since the DV cell population generates roughly 60% of regenerated hair cells, we sought  
176 to determine whether these cells were required for hair cell regeneration. To this end, we  
177 generated a transgenic line in which an enhanced-potency nitroreductase (*epNTR*; Tabor et al.,  
178 2014) fused to GFP was introduced into the *sost* locus using CRISPR ( $Tg[sost:epNTR-GFP]^{w216}$ ,  
179 hereafter known as *sost*:NTR-GFP). Nitroreductase is a bacterial enzyme that selectively binds  
180 its prodrug Metronidazole (Mtz), converting Mtz into toxic metabolites that kill the cells  
181 expressing it (Curado et al. 2007). We then compared the extent of *sost*:NTR-GFP expression in  
182 DV cells, as defined by the *sost*:nlsEos transgene. At 3 dpf, soon after the initiation of transgene  
183 expression, we see considerable overlap between NTR-GFP and nlsEos. All NTR-GFP<sup>+</sup> cells  
184 were also positive for nlsEos, while an additional subset of cells expressed nlsEos alone. When  
185 we compared expression at 5 dpf, the size of the double-positive (NTR-GFP<sup>+</sup>; nlsEos<sup>+</sup>)



186 population did not change, whereas the number of cells expressing nlsEos alone increased  
187 significantly, occupying a more central location (Fig. 5A-B, arrowheads; Fig. 5C; NTR-  
188 GFP/nlsEos:  $9.04 \pm 2.39$  [3 dpf] vs.  $8.47 \pm 2.27$  [5 dpf]; nlsEos only:  $6.10 \pm 2.27$  [3 dpf] vs.  
189  $10.86 \pm 2.72$  (5 dpf);  $p > 0.9999$  [NTR-GFP/nlsEos],  $p < 0.0001$  [nlsEos only]). These  
190 observations are consistent with the idea that both transgenes initiate expression at the same  
191 time, but that nlsEos protein is retained longer than NTR-GFP protein as cells mature and as a  
192 result, NTR-GFP is expressed in a subset of DV cells. We next tested to the efficacy of DV cell  
193 ablation at 3 and 5 dpf. Treatment of these fish with 10 mM Mtz for 8 hours was sufficient to  
194 ablate the majority of NTR-GFP cells. Treating fish with Mtz for 8 hours at 5 dpf (Mtz5) slightly  
195 but significantly decreased the number of support cells solely expressing nlsEos by about 13%.  
196 Treating fish with Mtz for 8 hours at 3 dpf, followed by a second 8-hour Mtz treatment at 5 dpf  
197 (Mtz3/5) decreased the number of solely nlsEos-positive cells even further, by about 40% (Fig.  
198 5D-G; Mock:  $11.18 \pm 2.04$ ; Mtz5:  $9.72 \pm 2.03$ ; Mtz3/5:  $6.76 \pm 2.12$ ;  $p = 0.0288$  [Mock vs.  
199 Mtz5],  $p < 0.0001$  [Mock vs. Mtz3/5, Mtz5 vs. Mtz3/5]).

200 We next tested the impact of DV cell ablation on hair cell regeneration. We compared  
201 two groups: neomycin exposure followed by Mtz treatment at 5 dpf (Neo/Mtz5), compared to  
202 Mtz treatment at 3 dpf, then neomycin treatment at 5 dpf followed by a second Mtz treatment  
203 (Mtz3/Neo/Mtz5; Fig. 6A). For both groups, nlsEos was photoconverted at 5 dpf, just prior to  
204 neomycin treatment, and larvae were fixed at 72 hpt and immunostained for GFP and  
205 Parvalbumin (to label NTR-GFP+ cells and hair cells, respectively). The Neo/Mtz5 treatment  
206 resulted in a small but significant reduction in both hair cells and nlsEos-positive hair cells per  
207 neuromast relative to normal regeneration (Fig. 6B-C, E-F; Total hair cells:  $11.73 \pm 2.10$  [Neo]  
208 vs.  $9.33 \pm 1.88$  [Neo/Mtz5];  $p = 0.0001$ ; nlsEos+ hair cells:  $7.78 \pm 2.36$  [Neo] vs.  $4.90 \pm 2.02$   
209 [Neo/Mtz5];  $p = 0.0003$ ). The Mtz3/Neo/Mtz5-treated larvae exhibited even fewer hair cells per  
210 neuromast (Fig. 6D, E;  $11.73 \pm 2.10$  [Neo] vs.  $7.52 \pm 1.74$  [Mtz3/Neo/Mtz5];  $p < 0.0001$ ), with  
211 nlsEos-labeled hair cells decreased to a mere 14% of total regenerated hair cells (Fig. 6G;  $65.81$   
212  $\pm 14.89$  [Neo] vs.  $14.29 \pm 18.10$  [Mtz3/Neo/Mtz5];  $p < 0.0001$ ). Importantly, Mtz treatment of  
213 siblings without the *sost*:NTR-GFP transgene had no impact on hair cell regeneration (Fig. 6 –  
214 figure supplement 1; Neo:  $9.5 \pm 1.50$ ; Mtz3/Neo/Mtz5:  $9.98 \pm 1.51$ ;  $p = 0.2317$ ). Thus, ablation  
215 of DV cells reduces the number of hair cells regenerated.

216 We then examined how Notch signaling impacted hair cell regeneration in the context of  
217 DV cell ablation. We treated *sost:NTR-GFP* larvae with 50  $\mu$ M LY for 24 hours following  
218 ablation (Mtz3/Neo/Mtz5/LY) and assayed hair cell number at 72 hpt (Fig. 7A). As expected, the  
219 number of regenerated hair cells increased significantly after LY treatment in all groups (Fig.  
220 7B-F;  $p < 0.0001$ ), and DV cell ablation significantly decreased hair cell regeneration (Fig. 7B,  
221 D, F;  $9.42 \pm 1.85$  [Neo] vs.  $6.86 \pm 1.76$  [Mtz3/Neo/Mtz5];  $p = 0.0058$ ). However, LY treatment  
222 following Mtz ablation resulted in significantly fewer regenerated hair cells than LY alone (Fig.  
223 7C, E, F;  $21.08 \pm 4.42$  [Neo/LY] vs.  $15.06 \pm 3.51$  [Mtz3/Neo/Mtz5/LY];  $p = 0.0029$ ), indicating  
224 that inhibiting Notch signaling cannot fully compensate for the loss of the DV population.

225

### 226 *AP and DV Cells Define Separate Progenitor Populations*

227 While the DV population generates roughly 60% of hair cells after damage, the other  
228 40% must derive from a different population. Consistent with this observation, reduction of DV  
229 cells by Mtz treatment only partially blocks new hair cell formation, indicating that there must be  
230 additional progenitor populations. We believed that AP cells could define this additional  
231 population, since they were capable of generating roughly 20% of regenerated hair cells (Fig.  
232 3E). However, there may be some overlap between the expression of *tnfsf10l3:nlsEos* defining  
233 the AP domain and *sost:nlsEos* defining the DV domain. When we crossed the *tnfsf10l3:nlsEos*  
234 and *sost:nlsEos* lines together, we found that roughly 88% of regenerated hair cells were nlsEos  
235 positive when larvae expressed both transgenes, compared to 65% from *sost:nlsEos* alone and  
236 28% from *tnfsf10l3:nlsEos* alone (Fig. 8A-E;  $p < 0.0001$ ). Thus, while not completely additive,  
237 these data suggest that the AP population is distinct from the DV population in terms of its  
238 progenitor function.

239 We next examined how the AP population would respond to the ablation of the DV  
240 population. We crossed the *tnfsf10l3:nlsEos* line to the *sost:NTR-GFP* line, sorted out double-  
241 positive larvae, and compared normal regeneration to that after Mtz treatment (Mtz3/Neo/Mtz5,  
242 since this had served to be the best treatment paradigm). As above, nlsEos was photoconverted at  
243 5 dpf, immediately prior to neomycin treatment, and larvae were fixed at 72 hpt and  
244 immunostained for GFP and Parvalbumin. Mtz-ablated larvae had significantly fewer hair cells  
245 than non-ablated larvae, as in previous experiments (Fig. 9C;  $10.36 \pm 1.60$  [Neo] vs.  $7.98 \pm 1.74$   
246 [Mtz3/Neo/Mtz5];  $p < 0.0001$ ), but the number of nlsEos-positive hair cells was no different



247 between the two groups (Fig. 9A-B, arrowheads; Fig. 9D;  $2.88 \pm 1.83$  [Neo] vs.  $3.14 \pm 1.43$   
248 [Mtz3/Neo/Mtz5];  $p = 0.3855$ ). The percentage of Eos-positive hair cells did increase, but this is  
249 only because the total number of hair cells decreased overall (Fig. 9E;  $27.26 \pm 16.00$  [Neo] vs.  
250  $40.43 \pm 19.44$  [Mtz3/Neo/Mtz5];  $p = 0.0002$ ). Thus, the AP population's progenitor function  
251 remains unchanged following DV ablation, providing further support that it is a separate  
252 progenitor population from the DV population.

253

### 254 *The DV Population Regenerates from Other Support Cell Subpopulations*

255 When examining hair cell regeneration following DV cell ablation, we consistently  
256 noticed that there was an increase in NTR-GFP+ cells at 72 hpt. This led us to hypothesize that  
257 DV cells were capable of regeneration even in the absence of hair cell damage. To test this, we  
258 first administered a 48-hour pulse of EdU (changing into fresh EdU solution after the first 24  
259 hours) immediately following Mtz ablation at 5 dpf and fixed immediately after EdU washout.  
260 At 48 hours post ablation, we observed slightly more than half the number of the NTR-GFP+  
261 cells relative to unablated larvae (Fig. 10C;  $8.94 \pm 1.62$  [Mock] vs.  $5.34 \pm 2.14$  [Mtz];  $p <$   
262  $0.0001$ ). However, 58% of NTR-GFP+ cells were EdU-positive in fish treated with Mtz,  
263 compared to just 15% in unablated larvae (Fig. 10A-B, arrowheads; Fig. 10D;  $p < 0.0001$ ). These  
264 results indicate that new DV cells arise from proliferation.

265 To determine the source of new DV cells, we crossed *sost:NTR-GFP* fish to our three  
266 different nlsEos lines. Double-transgenic fish were photoconverted at 5 dpf, Mtz-ablated, and  
267 then fixed at 72 hpt and immunostained for GFP. Following ablation, 56% of NTR-GFP+ cells  
268 expressed photoconverted nlsEos when DV cells were labeled, compared to 97% in unablated  
269 controls (Fig. 11A-B, arrowheads; Fig. 11C;  $p < 0.0001$ ). 31% of NTR-GFP+ cells expressed  
270 photoconverted nlsEos when Peripheral cells were labeled, compared to 6% in controls (Fig.  
271 11D-E, arrowheads; Fig. 11F;  $p < 0.0001$ ) and 21% of NTR-GFP+ cells expressed  
272 photoconverted nlsEos when AP cells were labeled, compared to 7% in controls (Fig. 11G-H,  
273 arrowheads; Fig. 11I;  $p = 0.0004$ ). Thus, DV cells are capable of being replenished after Mtz  
274 ablation by other DV cells as well as by both AP and Peripheral cells.

275

## 276 **DISCUSSION**

277 *Differences in Hair Cell Progenitor Identity Among Support Cell Populations*

278           The data shown above indicate that there are at least three spatially and functionally  
279 distinct progenitor populations within the neuromast: (1) a highly regenerative, dorsoventral  
280 (DV) population, marked by *sost:nlsEos*, which generates the majority of regenerated hair cells;  
281 (2) an anteroposterior (AP) population, marked by *tnfsf10l3:nlsEos*, which also contributes to  
282 hair cell regeneration albeit to a far lesser extent than *sost*; and (3) a peripheral population  
283 (Peripheral), marked by *sfrp1a:nlsEos*, that does not contain hair cell progenitors (Fig. 12). This  
284 model of high regenerative capacity in the dorsoventral region and low regenerative capacity in  
285 the anteroposterior region is consistent with the label-retaining studies performed by Cruz et al.,  
286 (2015) as well as the BrdU-localization studies of Romero-Carvajal et al., (2015). However, an  
287 examination of the overlap in expression between *sost:nlsEos* and *sost:NTR-GFP* reveals  
288 distinctions even amongst this DV progenitor population. We hypothesize that cells that express  
289 only nlsEos have matured from those that express both NTR-GFP and nlsEos. We posit that  
290 these more mature nlsEos cells serve as hair cell progenitors. Consistent with this idea, Mtz  
291 treatment at 5 dpf that spares nlsEos cells not expressing NTR-GFP has only a small effect on  
292 hair cell regeneration while Mtz treatment at both 3 and 5 dpf results in substantial reduction in  
293 hair cell regeneration.

294           While we have identified distinct hair cell progenitor populations (DV and AP), these  
295 populations do not account for all of the hair cell progenitors in the neuromast. The combination  
296 of these cells generated 88% of new hair cells, meaning that the remaining 12% were derived  
297 from other sources. Furthermore, the AP population only accounted for 40% of new hair cells  
298 generated after neomycin treatment following DV cell ablation. Thus, there must be some other  
299 population (or populations) of support cells that are serving as hair cell progenitors that we have  
300 not labeled with our transgenic techniques. The best candidates for this role are centrally located  
301 support cells found ventral to hair cells, although the identity of these cells remains to be  
302 determined.

303

### 304 *The Role of Planar Cell Polarity and Progenitor Localization*

305           Neuromasts located on the trunk develop at different times from different migrating  
306 primordia. Within a given neuromast, hair cells are arranged such that their apical stereocilia  
307 respond to directional deflection in one of two directions along the body axis. Hair cells derived  
308 from the first primordium (primI) respond along the anteroposterior axis, and hair cells derived

309 from the second primordium (primII) respond along the dorsoventral axis (López-Schier et al.  
310 2004; López-Schier and Hudspeth 2006). Spatial restriction of support cell proliferation is  
311 orthogonal to hair cell planar polarity, with proliferation occurring dorsoventrally in primI-  
312 derived neuromasts and anteroposteriorly in primII-derived neuromasts (Romero-Carvajal et al.  
313 2015). This 90-degree switch between primI- and primII-derived neuromasts is reflected in the  
314 distribution of labeled cell populations as well: *tnfsf10l3:nlsEos* and *sost:nlsEos* retain their  
315 asymmetric localization in primII-derived neuromasts, but *tnfsf10l3:nlsEos* is predominantly  
316 expressed in the dorsoventral region and *sost:nlsEos* is restricted to the anteroposterior region  
317 (data not shown). *Sfrp1a:nlsEos* expression remains limited to the periphery. Thus, within a  
318 given neuromast along the trunk, expression of *sost:nlsEos* is orthogonal to hair cell planar  
319 polarity, and that of *tnfsf10l3:nlsEos* is parallel to hair cell planar polarity.

320 The relationship between asymmetric progenitor localization and hair cell planar polarity  
321 remains unknown. Planar cell polarity (PCP) signaling often drives asymmetry in other tissues  
322 and has been implicated in the planar polarity of lateral line hair cells. Zebrafish deficient in  
323 *Vangl2*, a critical component of the PCP pathway, still develop neuromasts, but their hair cells  
324 are oriented randomly toward one another and do not respond along a single axis (López-Schier  
325 and Hudspeth 2006). Furthermore, this random orientation stems from misaligned divisions of  
326 hair cell progenitors (Mirkovic, Pylawka, and Hudspeth 2012). The transcription factor *Emx2*  
327 has also been recently implicated in determining hair cell planar polarity (Jiang, Kindt, and Wu  
328 2017). Whether these genes or other components of PCP signaling mediate the asymmetric  
329 expression of *sost:nlsEos* and *tnfsf10l3:nlsEos* remains to be determined. It would also be  
330 interesting to examine whether hair cell planar polarity is influenced by the asymmetric  
331 localization of these progenitor populations, or vice versa.

332

### 333 *Regeneration of Support Cells in the Absence of Hair Cell Damage*

334 Since zebrafish are able to properly regenerate their hair cells after multiple successive  
335 insults (Cruz et al. 2015; Pinto-Teixeira et al. 2015), and both daughters of progenitors give rise  
336 to hair cells, there must be a means of replenishing hair cell progenitors. Our EdU/BrdU double  
337 labeling experiment qualitatively demonstrated that hair cell progenitors could be replenished via  
338 proliferation of other support cells. It was thus unsurprising that DV cells could themselves  
339 regenerate. It is notable, however, that DV cells could be replenished even in the absence of hair

340 cell damage, which means that hair cell death is not the sole signal that triggers support cell  
341 proliferation. Support cell regeneration in the absence of hair cell death has been observed in  
342 mammals, as certain types of cochlear support cells (inner border cells and inner phalangeal  
343 cells) are capable of regeneration following selective ablation, a process that occurs via  
344 transdifferentiation (Mellado Lagarde et al. 2014). In contrast, zebrafish DV cell regeneration  
345 primarily occurs via proliferation, as a majority of new DV cells were EdU-positive following  
346 Mtz-induced ablation. DV cells that were not EdU-positive could have arisen after the EdU  
347 pulse, been retained due to incomplete ablation, or potentially resulted from transdifferentiation  
348 from another source.

349 All three labeled support cell populations were able to replenish DV cells following Mtz-  
350 induced ablation. DV cells themselves contributed nearly 60% of new DV cells, although we  
351 cannot rule out that this number is inflated due to incomplete ablation. This result suggests that  
352 DV cells choose to either generate new hair cells or replenish lost DV cells, undergoing a form  
353 of self-renewal that does not require asymmetric division. The AP population is also capable of  
354 replenishing DV cells. That both of these populations can generate new DV cells is consistent  
355 with recent findings from Viader-Llargués et al., (2018). This study defined support cells as a  
356 peripheral mantle population and a central sustentacular population. Following laser ablation of  
357 large portions of the neuromast, they found that sustentacular cells were able to regenerate  
358 mantle cells and other sustentacular cells, as well as hair cells, and could thus be considered  
359 tripotent progenitors. The transgenic lines they used to label sustentacular cells were broadly  
360 expressed, and thus should encompass both AP and DV populations. While we have not been  
361 able to selectively ablate the Peripheral cell population, and therefore cannot test whether DV  
362 and AP populations can generate them, the DV and AP populations can both generate new hair  
363 cells and new DV cells, indicating that they are both at least bipotent.

364 We found that the Peripheral population could also generate new DV cells following  
365 Mtz-induced ablation. Furthermore, it contributes more to DV regeneration than does the AP  
366 population. This was especially surprising since proliferation has rarely been observed in  
367 peripheral cells, at least during normal hair cell regeneration (Ma, Rubel, and Raible 2008;  
368 Romero-Carvajal et al. 2015). However, the loss of a progenitor population could be considered  
369 to be a case of extreme damage to the neuromast, thus prompting the Peripheral cell population  
370 to respond. That Peripheral cells can serve as progenitors only in extreme circumstances is

371 consistent with the findings of Romero-Carvajal et al., 2015 and Viader-Llargués et al., 2018.  
372 Both studies suggested that mantle cells are capable of regenerating other cell types in the  
373 neuromast following extreme damage. However, the latter study found that mantle cells could  
374 only generate other mantle cells. Whether the Peripheral cell population in particular is capable  
375 of doing the same remains to be tested. Mantle cells have also been shown to proliferate  
376 following tail amputation, forming a migratory placode that forms new neuromasts along the  
377 regenerated tail (Jones and Corwin 1993; Dufourcq et al. 2006). Given the differences across  
378 studies, we have hesitated to designate the *sfrp1a:nlsEos* labeled cells as mantle cells and have  
379 instead adopted the "Peripheral" label. Since Peripheral cells can generate hair cell progenitors,  
380 we have characterized them as “upstream progenitors” (Fig. 12).

381 The zebrafish lateral line system continues to grow through larval and adult stages  
382 (Nuñez et al. 2009; Ledent 2002; Sapède et al. 2002), with new neuromasts formed from budding  
383 from extant neuromasts (Nuñez et al. 2009; Wada, Dambly-Chaudière, et al. 2013; Wada,  
384 Ghysen, et al. 2013) and generated anew from interneuromast cells, latent precursors deposited  
385 between neuromasts by the migrating primordium (Nuñez et al. 2009; Grant, Raible, and  
386 Piotrowski 2005). We note that the *sfrp1a:nlsEos* transgene is expressed in interneuromast cells  
387 as well as Peripheral neuromast cells. Whether these cells share similar properties to generate  
388 new neuromasts remains to be tested.

389 Our model of neuromast progenitor identity does bear some similarities with other  
390 regenerative tissues. Both the hair follicle and intestinal epithelium contain a niche of stem cells  
391 (bulge cells and crypt cells, respectively) which generate transit-amplifying cells that are able to  
392 generate other cell types (Ito et al. 2005; Taylor et al. 2000; Barker et al. 2007). Due to their high  
393 rate of proliferation and multipotency, the DV cells in the neuromast could be likened to these  
394 transit-amplifying cells. However, progenitors in the neuromast may bear the most similarity to  
395 those of the olfactory epithelium, which contains two distinct progenitor populations: globose  
396 basal cells (GBCs), which are transit-amplifying cells that can restore lost olfactory neurons; and  
397 horizontal basal cells (HBCs), a quiescent population that can generate multiple cell types,  
398 including GBCs, in instances of extreme damage (Iwai et al. 2008; Leung, Coulombe, and Reed  
399 2007). In our model, the DV and Peripheral cells are comparable to the GBCs and HBCs,  
400 respectively. However, we cannot make the claim that the Peripheral population is a resident

401 stem cell population (like bulge cells, crypt cells, and HBCs), as we do not yet know if it is  
402 capable of self-renewal or of generating every cell type within the neuromast.

403

#### 404 *Notch Signaling Differentially Regulates Support Cell Populations*

405 Inhibition of Notch signaling during hair cell regeneration significantly increased the  
406 number of hair cells derived from both DV and AP cells, which was not unexpected given that  
407 both are hair cell progenitor populations. However, Notch inhibition had a greater impact on the  
408 AP population than on the DV population, suggesting that it may be more strongly regulated by  
409 Notch signaling. The receptor *notch3*, in particular, is most strongly expressed in the  
410 anteroposterior portions of the neuromast (Wibowo et al. 2011; Romero-Carvajal et al. 2015).  
411 Furthermore, a transgenic reporter of Notch activity is also expressed in the anteroposterior  
412 region (Romero-Carvajal et al. 2015; Wibowo et al. 2011). It is thus likely that asymmetrically-  
413 localized Notch signaling maintains quiescence among AP cells during homeostasis and is  
414 responsible for suppressing the contribution of the AP population to hair cell regeneration  
415 (compared to DV contribution). Since Notch signaling is not as strong in the dorsoventral  
416 regions of the neuromast, the DV population is less affected and could already be more “primed”  
417 to serve as hair cell progenitors than the AP population.

418 Notch inhibition did not have any impact on the Peripheral population’s contribution to  
419 hair cell regeneration, indicating that Notch signaling does not suppress hair cell production by  
420 Peripheral cells. While it is difficult to tell from *in situ* expression, it seems that the Notch  
421 reporter is not active in the peripheral mantle cells (Wibowo et al. 2011; Romero-Carvajal et al.  
422 2015). Thus, there must be some other mechanism, either intrinsic or extrinsic, that maintains  
423 relative quiescence among the Peripheral population.

424 It is not clear why these distinct populations of progenitors exist, as there is no clear  
425 difference in the types of hair cells they produce. Hair cells polarized in opposing direction are  
426 daughters of the final division of the hair cell progenitor (López-Schier and Hudspeth 2006).  
427 Heterogeneity has also been recently described in the synaptic responses of lateral line hair cells  
428 (Zhang et al. 2018), but these differences appear lineage-independent. Instead, the allocation of  
429 distinct progenitors may serve an advantage with respect to their differential regulation. For  
430 example, our data suggest that DV cells contribute more to homeostatic addition of new hair  
431 cells to the neuromast in the absence of damage, while both AP and DV cells are engaged after



432 hair cell damage. AP cells were unable to overcome the loss of the DV population, suggesting  
433 that feedback mechanisms regulating both hair cell production and progenitor replacement  
434 operate independently. While both AP and DV populations are regulated by Notch signaling, this  
435 regulation appears to operate independently as Notch inhibition does not compensate for DV  
436 ablation. Independent progenitors may offer the flexibility to add new hair cells under a variety  
437 of conditions for both ongoing hair cell turnover and in the face of catastrophic hair cell loss.

438

## 439 **MATERIALS AND METHODS**

### 440 Fish Maintenance

441 Experiments were conducted on 5-8 dpf larval zebrafish (except for the double hair cell ablation  
442 experiment, which was conducted on 15-18 dpf fish). Larvae were raised in E3 embryo medium  
443 (14.97 mM NaCl, 500  $\mu$ M KCL, 42  $\mu$ M Na<sub>2</sub>HPO<sub>4</sub>, 150  $\mu$ M KH<sub>2</sub>PO<sub>4</sub>, 1 mM CaCl<sub>2</sub> dihydrate, 1  
444 mM MgSO<sub>4</sub>, 0.714 mM NaHCO<sub>3</sub>, pH 7.2) at 28.5°C. All wildtype animals were of the AB  
445 strain. Zebrafish experiments and husbandry followed standard protocols in accordance with  
446 University of Washington Institutional Animal Care and Use Committee guidelines.

447

### 448 Plasmid Construction

449 The myo6b:mKate2 construct was generated via the Gateway Tol2 system (Invitrogen). A pME-  
450 mKate2 (the mKate2 sequence being cloned from pMTB-Multibow-mfR, Addgene #60991)  
451 construct was generated via BP Recombination, and then a pDEST-myo6b:mKate2 construct  
452 was generated via LR recombination of p5E-myo6b, pME-mKate2, p3E-pA, and pDEST-iTol2-  
453 pA2 vectors. The mbait-GFP construct was a gift from Shin-Ichi Higashijima's lab. The mbait-  
454 nlsEos construct was also generated via Gateway LR recombination of p5E-mbait/HSP701, pME-  
455 nlsEos, p3E-pA, and pDEST-iTol2-pA2 vectors. The mbait-epNTR-GFP construct was  
456 generated via Gibson assembly, inserting the coding sequence of epNTR (cloned from pCS2-  
457 epNTR obtained from Harold Burgess' lab) plus a small linker sequence in front of the GFP in  
458 the original pBSK mbait-GFP vector. All plasmids were maxi prepped (Qiagen) prior to  
459 injection.

460

### 461 CRISPR Guides

462 Gene-specific guide RNA (gRNA) sequences were as follows:

463 *sfrp1a*: GTCTGGCCTAAAGAGACCAG  
464 *tnfsf10l3*: GGGCTTGTATAGGAGTCACG  
465 *sost*: GGGAGTGAGCAGGGATGCAA  
466 GGGCGAAGAACGGTGAAGG

467  
468 All gRNAs were synthesized according to the protocol outlined in (Shah et al. 2015), but were  
469 purified using a Zymo RNA Clean & Concentrator kit. Upon purification, gRNAs were diluted  
470 to 1 µg/µL, aliquoted into 4 µL aliquots, and stored at -80°C. *Sfrp1a* and *tnfsf10l3* gRNA  
471 sequences were designed via <http://crispr.mit.edu>, and the *sost* gRNA sequences were designed  
472 via <http://crisprscan.org>. The *tnfsf10l3* gRNA was targeted upstream of the gene's start ATG  
473 codon, whereas the *sfrp1a* and *sost* guides were targeted to exons.

#### 474 475 Tol2 Transgenesis

476 The Tg[myo6b:mKate2]<sup>w218</sup> (hereafter called myo6:mKate2) line was generated via Tol2  
477 transgenesis. 1-2 nL of a 5 µL injection mix consisting of 20 ng/µL myo6b:mKate2 plasmid, 40  
478 ng/µL transposase mRNA, and 0.2% phenol red were injected into single cell wildtype embryos.  
479 Larvae were screened for expression at 3 dpf and transgenic F<sub>0</sub> larvae were grown to adulthood.  
480 F<sub>0</sub> adults were outcrossed to wildtype fish, transgenic offspring were once again grown to  
481 adulthood, and the resulting adults were used to maintain a stable line.

#### 482 483 CRISPR-mediated Transgenesis

484 All support cell transgenic lines were generated via CRISPR-mediated transgenesis. For most  
485 injections, a 5 µL injection mix was made consisting of 200 ng/µL gene-specific gRNA, 200  
486 ng/µL mbait gRNA, 800 ng/µL Cas9 protein (PNA Bio #CP02), 20 ng/µL mbait-reporter  
487 plasmid, and 0.24% phenol red. The gRNAs and Cas9 protein were mixed together first, then  
488 heated at 37°C for 10 minutes, after which the other components were added. In the case of *sost*,  
489 in which two gRNAs were co-injected, each gRNA was added to the mix at a final concentration  
490 of 100 ng/µL (so 200 ng/µL of total guide-specific gRNA). When reconstituting the Cas9  
491 protein, DTT was added to a final concentration of 1 mM DTT. This is highly recommended to  
492 reduce needle clogging during the injection process!! 1-2 nL of these injection mixes were  
493 injected into single cell wildtype embryos. Larvae were screened for expression at 3 dpf and  
494 transgenic F<sub>0</sub> larvae were grown to adulthood. F<sub>0</sub> adults were outcrossed to wildtype fish,

495 transgenic offspring were once again grown to adulthood, and the resulting adults were used to  
496 maintain a stable line.

497

#### 498 Photoconversion

499 In order to photoconvert multiple nlsEos fish at once, larvae were transferred to a 60 x 15mm  
500 petri dish and placed in a freezer box lined with aluminum foil. Then, an iLumen 8 UV flashlight  
501 (procured from Amazon) was placed over the dish and turned on for 15 minutes. Following the  
502 UV pulse, larvae were returned to standard petri dishes to await experimentation.

503

#### 504 Drug Treatments

505 For all drug treatments, zebrafish larvae were placed in baskets in 6 well plates to facilitate  
506 transfer of larvae between media. Larvae were treated at 5 dpf unless otherwise noted. All wells  
507 contained 10 mL of drug, E3 embryo medium with the same effective % DMSO as the drug (for  
508 mock treatments), or plain E3 embryo medium for washout. Following treatment, the fish were  
509 washed twice into fresh E3 embryo medium by moving the baskets into adjacent wells in the  
510 row, then washed a third time by transferring them into a 100 mm petri dish with fresh E3  
511 medium. All drugs were diluted in E3 embryo medium. The drug treatment paradigms were as  
512 follows: for hair cell ablation, 400  $\mu$ M neomycin (Sigma) for 30 minutes; for *sost*:NTR ablation,  
513 10 mM metronidazole (Mtz; Sigma) with 1% DMSO; for Notch inhibition, 50  $\mu$ M LY411575  
514 (LY; Sigma) for 24 hours; for the *sost* ablation/Notch inhibition experiment (Fig. 10): 10mM  
515 Mtz/50  $\mu$ M LY for 8 hours, then 50  $\mu$ M LY for 16 hours.

516

517 For double hair cell ablation studies, larvae that were treated with neomycin were raised on a  
518 nursery in the UW fish facility beginning at 7 dpf and then treated with 400  $\mu$ M neomycin again  
519 at 15 dpf in standard petri dishes (10 days following the first neomycin treatment). These  
520 juvenile fish were washed into fresh system water multiple times before being returned to the  
521 nursery and were then fixed three days later (18 dpf).

522

#### 523 EdU and BrdU Treatments

524 Following hair cell ablation with neomycin, larvae were incubated in 500  $\mu$ M F-ara-EdU (Sigma  
525 #T511293) for 24 hours. Following *sost*:NTR ablation with Mtz, larvae were incubated in the

526 same concentration of EdU for 48 hours. Larvae were placed into fresh EdU after the first 24  
527 hours. F-ara-EdU was originally reconstituted in 50% H<sub>2</sub>O and 50% DMSO to 50 mM, so the  
528 working concentration of DMSO of 500  $\mu$ M was 0.5%. In the case of the double ablation studies,  
529 juvenile fish were incubated in 10mM BrdU (Sigma) with 1% DMSO in system water (used in  
530 the UW fish facility) following the second neomycin treatment for 24 hours. Following  
531 treatment, larvae were washed in fresh system water several times.

532

### 533 Immunohistochemistry

534 Zebrafish larvae were fixed in 4% paraformaldehyde in PBS containing 4% sucrose for either 2  
535 hours at room temperature or overnight at 4°C. Larvae were then washed 3 times (20 minutes  
536 each) in PBS containing 0.1% Tween20 (PBT), incubated for 30 minutes in distilled water, then  
537 incubated in antibody block (5% heat-inactivated goat serum in PBS containing 0.2% Triton, 1%  
538 DMSO, 0.02% sodium azide, and 0.2% BSA) for at least one hour at room temperature. Larvae  
539 were then incubated in mouse anti-parvalbumin or rabbit anti-GFP (or sometimes both  
540 simultaneously) diluted 1:500 in antibody block overnight at 4°C. The next day, larvae were  
541 once again washed 3 times (20 minutes each) in PBT, then incubated in a fluorescently-  
542 conjugated secondary antibody (Invitrogen, Alexa Fluor 488, 568, and/or 647) diluted 1:1000 in  
543 antibody block for 4-5 hours at room temperature. From this point onward, larvae were protected  
544 from light. Larvae were then rinsed 3 times (10 minutes each) in PBT and then stored in antibody  
545 block at 4°C until imaging. For BrdU immunohistochemistry, juvenile fish were rinsed once in  
546 1N HCl, then incubated in 1N HCl following washout of Click-iT reaction mix (see below). IHC  
547 proceeded as above, except that the antibody block contained 10% goat serum and the fish were  
548 incubated in mouse anti-BrdU at a dilution of 1:100. All wash and incubation steps occurred with  
549 rocking.

550

### 551 Click-iT

552 Cells that had incorporated F-ara-EdU were visualized via a Click-iT reaction. In the case of the  
553 double hair cell ablation experiment, Click-iT was performed before immunohistochemistry.  
554 Following fixation, fish were washed 3 times (10 minutes each) in PBT, then permeabilized in  
555 PBS containing 0.5% Triton-X for 30 minutes, then washed another 3 times (10 minutes each) in  
556 PBS. Next, fish were incubated for 1 hour at room temperature in a Click-iT reaction mix

557 consisting of 2mM CuSO<sub>4</sub>, 10 μM Alexa Fluor 555 azide, and 20 mM sodium ascorbate in PBS  
558 (made fresh). Fish were protected from light from this point onwards. Afterwards, the standard  
559 IHC protocol listed above was performed (beginning with the 3 20-minute washes in PBT). For  
560 the *sost*:NTR regeneration experiment, the Click-iT reaction was performed after IHC.  
561 Following incubation in secondary antibody, larvae were washed 3 times (10 minutes each) in  
562 PBS, then incubated in 700 μL of the Click-iT reaction mix (again, made immediately prior to  
563 incubation) for 1 hour at room temperature. Larvae were then washed 6 times (20 minutes each)  
564 in PBT to ensure proper clearing of background labeling and stored in antibody block at 4°C  
565 until imaging.

566

### 567 Confocal Imaging

568 With the exception of imaging requiring a far-red laser (Fig. 1F-N, Fig. 3C-I, Fig. 5), all imaging  
569 was performed using an inverted Marianas spinning disk system (Intelligent Imaging  
570 Innovations, 3i) with an Evolve 10 MHz EMCCD camera (Photometrics) and a Zeiss C-  
571 Apochromat 63x/1.2W numerical aperture water objective. All imaging experiments were  
572 conducted with fixed larvae ages 5-8 dpf. Fish were placed in a chambered borosilicate  
573 coverglass (Lab-Tek) containing 2.5-2.5 mL E3 embryo medium and oriented on their sides with  
574 a slice anchor harp (Harvard Instruments). Imaging was performed at ambient temperature,  
575 generally 25°C. Fish were positioned on their sides against the cover glass in order to image the  
576 first 5 primary neuromasts of the posterior lateral line (P1-P5). All imaging was performed with  
577 an intensification of 650, a gain of 3, an exposure time between 25-1500 ms (depending on the  
578 brightness of the signal) for 488, 561, and 405 lasers, and a step size of 1 μm. All 3i Slidebook  
579 images were exported as .tif files to Fiji.

580

581 In cases when a far-red laser was required, imaging was performed on a Zeiss LSM 880  
582 microscope with a Zeiss C-Apochromat 40x/1.2W numerical water objective. Fish were  
583 immersed in a solution of 50%glycerol/50% PBS, and then mounted on a plain microscope slide  
584 (Richard-Allen) beneath a triple wholemount coverslip. Imaging was performed at ambient  
585 temperature, generally 25°C. Fish were positioned on their sides against the cover glass in order  
586 to image the first 5 primary neuromasts of the posterior lateral line (P1-P5). For the double hair  
587 cell ablation experiment, following fixation the tails of fish were cut off and mounted underneath

588 a single wholemount coverslip. The 3 neuromasts of the terminal cluster were imaged per tail.  
589 All imaging was performed at 4-5x digital zoom with master gain between 500-800 for 488, 561,  
590 and 647 lasers, and a step size of 1  $\mu$ m. All images were captured through the Zen Black  
591 software and opened in Fiji as .czi files.

592

### 593 Statistical Analysis

594 All statistical analyses were done with GraphPad Prism 6.0. The Mann Whitney U test was used  
595 for comparisons between 2 groups, whereas the Kruskal-Wallis test, with a Dunn's post-test, was  
596 used for comparisons between 3 or more groups. Statistical significance was set at  $p = 0.05$ .

597

### 598 **ACKNOWLEDGEMENTS**

599 We would like to thank David White and the staff of the UW Fish Facility for animal care and  
600 maintenance, Ivan Cruz for providing the *sost* gRNA, Shin-Ichi Higashijima for the mbait-GFP  
601 vector, Harold Burgess for the pCS2-epNTR vector, Madeleine Hewitt for assistance with data  
602 analysis, and Sarah Pickett for critical reading of the manuscript.

603

### 604 **AUTHOR CONTRIBUTIONS**

605 Conceptualization and Methodology: E.D.T. and D.W.R.; Investigation: E.D.T.; Writing –  
606 Original Draft: E.D.T.; Writing – Review & Editing: E.D.T. and D.W.R.; Funding Acquisition:  
607 D.W.R.; Supervision: D.W.R.

608

### 609 **DECLARATION OF COMPETING INTERESTS**

610 The authors declare no competing interests.

611

### 612 **REFERENCES**

613 Barker, Nick, Johan H. van Es, Jeroen Kuipers, Pekka Kujala, Maaïke van den Born, Miranda  
614 Cozijnsen, Andrea Haegebarth, et al. 2007. "Identification of Stem Cells in Small Intestine  
615 and Colon by Marker Gene *Lgr5*." *Nature* 449 (7165): 1003–7. doi:10.1038/nature06196.  
616 Choi, Rhea, and Bradley J. Goldstein. 2018. "Olfactory Epithelium: Cells, Clinical Disorders,  
617 and Insights from an Adult Stem Cell Niche." *Laryngoscope Investigative Otolaryngology* 3  
618 (1). Wiley-Blackwell: 35–42. doi:10.1002/lio2.135.



- 619 Cruz, Ivan A., Ryan Kappedal, Scott M. Mackenzie, Dale W. Hailey, Trevor L. Hoffman,  
620 Thomas F. Schilling, and David W. Raible. 2015. “Robust Regeneration of Adult Zebrafish  
621 Lateral Line Hair Cells Reflects Continued Precursor Pool Maintenance.” *Developmental*  
622 *Biology* 402 (2). Academic Press Inc.: 229–38. doi:10.1016/j.ydbio.2015.03.019.
- 623 Curado, Silvia, Ryan M. Anderson, Benno Jungblut, Jeff Mumm, Eric Schroeter, and Didier  
624 Y.R. Stainier. 2007. “Conditional Targeted Cell Ablation in Zebrafish: A New Tool for  
625 Regeneration Studies.” *Developmental Dynamics* 236 (4): 1025–35.  
626 doi:10.1002/dvdy.21100.
- 627 Dufourcq, Pascale, Myriam Roussigné, Patrick Blader, Frédéric Rosa, Nadine Peyrieras, and  
628 Sophie Vríz. 2006. “Mechano-Sensory Organ Regeneration in Adults: The Zebrafish  
629 Lateral Line as a Model.” *Molecular and Cellular Neuroscience* 33 (2). Academic Press:  
630 180–87. doi:10.1016/J.MCN.2006.07.005.
- 631 Grant, Kelly a., David W. Raible, and Tatjana Piotrowski. 2005. “Regulation of Latent Sensory  
632 Hair Cell Precursors by Glia in the Zebrafish Lateral Line.” *Neuron* 45 (1): 69–80.  
633 doi:10.1016/j.neuron.2004.12.020.
- 634 Harris, Julie A, Alan G Cheng, Lisa L Cunningham, Glen MacDonald, David W Raible, and  
635 Edwin W Rubel. 2003. “Neomycin-Induced Hair Cell Death and Rapid Regeneration in the  
636 Lateral Line of Zebrafish (*Danio Rerio*).” *Journal of the Association for Research in*  
637 *Otolaryngology : JARO* 4 (2): 219–34. doi:10.1007/s10162-002-3022-x.
- 638 Hsu, Ya-Chieh, Lishi Li, and Elaine Fuchs. 2014. “Emerging Interactions between Skin Stem  
639 Cells and Their Niches.” *Nature Medicine* 20 (8): 847–56. doi:10.1038/nm.3643.
- 640 Ito, Mayumi, Yaping Liu, Zaixin Yang, Jane Nguyen, Fan Liang, Rebecca J Morris, and George  
641 Cotsarelis. 2005. “Stem Cells in the Hair Follicle Bulge Contribute to Wound Repair but  
642 Not to Homeostasis of the Epidermis.” *Nature Medicine* 11 (12): 1351–54.  
643 doi:10.1038/nm1328.
- 644 Iwai, Naomi, Zhijian Zhou, Dennis R Roop, and Richard R Behringer. 2008. “Horizontal Basal  
645 Cells Are Multipotent Progenitors in Normal and Injured Adult Olfactory Epithelium.” *Stem*  
646 *Cells (Dayton, Ohio)* 26 (5). NIH Public Access: 1298–1306. doi:10.1634/stemcells.2007-  
647 0891.
- 648 Jiang, Tao, Katie Kindt, and Doris K Wu. 2017. “Transcription Factor Emx2 Controls  
649 Stereociliary Bundle Orientation of Sensory Hair Cells.” *ELife* 6. eLife Sciences

- 650 Publications, Ltd. doi:10.7554/eLife.23661.
- 651 Jones, JE, and JT Corwin. 1993. “Replacement of Lateral Line Sensory Organs during Tail  
652 Regeneration in Salamanders: Identification of Progenitor Cells and Analysis of Leukocyte  
653 Activity.” *Journal of Neuroscience* 13 (3). Society for Neuroscience: 1022–34.  
654 doi:10.1523/JNEUROSCI.13-03-01022.1993.
- 655 Kimura, Yukiko, Yu Hisano, Atsuo Kawahara, and Shin-Ichi Higashijima. 2014. “Efficient  
656 Generation of Knock-in Transgenic Zebrafish Carrying Reporter/Driver Genes by  
657 CRISPR/Cas9-Mediated Genome Engineering.” *Scientific Reports*. doi:10.1038/srep06545.
- 658 Ledent, Valérie. 2002. “Postembryonic Development of the Posterior Lateral Line in Zebrafish.”  
659 *Development* 129 (3).
- 660 Leung, Cheuk T, Pierre A Coulombe, and Randall R Reed. 2007. “Contribution of Olfactory  
661 Neural Stem Cells to Tissue Maintenance and Regeneration.” *Nature Neuroscience* 10 (6):  
662 720–26. doi:10.1038/nn1882.
- 663 López-Schier, Hernán, and A J Hudspeth. 2006. “A Two-Step Mechanism Underlies the Planar  
664 Polarization of Regenerating Sensory Hair Cells.” *Proceedings of the National Academy of  
665 Sciences of the United States of America* 103 (49): 18615–20.  
666 doi:10.1073/pnas.0608536103.
- 667 López-Schier, Hernán, Catherine J. Starr, James a. Kappler, Richard Kollmar, and a. J.  
668 Hudspeth. 2004. “Directional Cell Migration Establishes the Axes of Planar Polarity in the  
669 Posterior Lateral-Line Organ of the Zebrafish.” *Developmental Cell* 7 (3): 401–12.  
670 doi:10.1016/j.devcel.2004.07.018.
- 671 Ma, Eva Y., Edwin W. Rubel, and David W. Raible. 2008. “Notch Signaling Regulates the  
672 Extent of Hair Cell Regeneration in the Zebrafish Lateral Line.” *The Journal of  
673 Neuroscience* 28 (9): 2261–73. doi:10.1523/JNEUROSCI.4372-07.2008.
- 674 Mackenzie, Scott M., and David W. Raible. 2012. “Proliferative Regeneration of Zebrafish  
675 Lateral Line Hair Cells after Different Ototoxic Insults.” *PLoS ONE* 7 (10): 1–8.  
676 doi:10.1371/journal.pone.0047257.
- 677 McMenamin, Sarah K., Emily J. Bain, Anna E. McCann, Larissa B. Patterson, Dae Seok Eom,  
678 Zachary P. Waller, James C. Hamill, Julie A. Kuhlman, Judith S. Eisen, and David M.  
679 Parichy. 2014. “Thyroid Hormone-Dependent Adult Pigment Cell Lineage and Pattern in  
680 Zebrafish.” *Science (New York, N.Y.)* 345 (6202). NIH Public Access: 1358.

- 681           doi:10.1126/SCIENCE.1256251.
- 682 Mellado Lagarde, Marcia M, Guoqiang Wan, LingLi Zhang, Angelica R Gigliello, John J  
683           McInnis, Yingxin Zhang, Dwight Bergles, Jian Zuo, and Gabriel Corfas. 2014.  
684           “Spontaneous Regeneration of Cochlear Supporting Cells after Neonatal Ablation Ensures  
685           Hearing in the Adult Mouse.” *Proceedings of the National Academy of Sciences of the*  
686           *United States of America* 111 (47). National Academy of Sciences: 16919–24.  
687           doi:10.1073/pnas.1408064111.
- 688 Mirkovic, I., S. Pylawka, and a. J. Hudspeth. 2012. “Rearrangements between Differentiating  
689           Hair Cells Coordinate Planar Polarity and the Establishment of Mirror Symmetry in Lateral-  
690           Line Neuromasts.” *Biology Open* 1 (5): 498–505. doi:10.1242/bio.2012570.
- 691 Mizutari, Kunio, Masato Fujioka, Makoto Hosoya, Naomi Bramhall, Hideyuki Hirota James  
692           Okano, Hideyuki Hirota James Okano, and Albert S B Edge. 2013. “Notch Inhibition  
693           Induces Cochlear Hair Cell Regeneration and Recovery of Hearing after Acoustic Trauma.”  
694           *Neuron* 77 (1). Elsevier Inc.: 58–69. doi:10.1016/j.neuron.2012.10.032.
- 695 Neef, A. B., and N. W. Luedtke. 2011. “Dynamic Metabolic Labeling of DNA in Vivo with  
696           Arabinosyl Nucleosides.” *Proceedings of the National Academy of Sciences* 108 (51):  
697           20404–9. doi:10.1073/pnas.1101126108.
- 698 Nuñez, Viviana a., Andres F. Sarrazin, Nicolas Cubedo, Miguel L. Allende, Christine Dambly-  
699           Chaudière, and Alain Ghysen. 2009. “Postembryonic Development of the Posterior Lateral  
700           Line in the Zebrafish.” *Evolution and Development* 11 (4): 391–404. doi:10.1111/j.1525-  
701           142X.2009.00346.x.
- 702 Ota, Satoshi, Kiyohito Taimatsu, Kanoko Yanagi, Tomohiro Namiki, Rie Ohga, Shin-ichi  
703           Higashijima, and Atsuo Kawahara. 2016. “Functional Visualization and Disruption of  
704           Targeted Genes Using CRISPR/Cas9-Mediated EGFP Reporter Integration in Zebrafish.”  
705           *Scientific Reports* 6 (1): 34991. doi:10.1038/srep34991.
- 706 Pinto-Teixeira, F., O. Viader-Llargues, E. Torres-Mejia, M. Turan, E. Gonzalez-Gualda, L. Pola-  
707           Morell, and H. Lopez-Schier. 2015. “Inexhaustible Hair-Cell Regeneration in Young and  
708           Aged Zebrafish.” *Biology Open* 4 (7): 903–9. doi:10.1242/bio.012112.
- 709 Romero-Carvajal, Andrés, Joaquín Navajas Acedo, Linjia Jiang, Agne Kozlovskaja-Gumbriene,  
710           Richard Alexander, Hua Li, Tatjana Piotrowski, et al. 2015. “Regeneration of Sensory Hair  
711           Cells Requires Localized Interactions between the Notch and Wnt Pathways.”

- 712 *Developmental Cell* 34 (3). NIH Public Access: 267–82. doi:10.1016/j.devcel.2015.05.025.
- 713 Rompolas, Panteleimon, and Valentina Greco. 2014. “Stem Cell Dynamics in the Hair Follicle
- 714 Niche.” *Seminars in Cell & Developmental Biology* 25–26. NIH Public Access: 34–42.
- 715 doi:10.1016/j.semcdb.2013.12.005.
- 716 Santos, António J M, Yuan-Hung Lo, Amanda T Mah, and Calvin J Kuo. 2018. “The Intestinal
- 717 Stem Cell Niche: Homeostasis and Adaptations.” *Trends in Cell Biology* 0 (0). Elsevier.
- 718 doi:10.1016/j.tcb.2018.08.001.
- 719 Sapède, Dora, Nicolas Gompel, Christine Dambly-Chaudière, and Alain Ghysen. 2002. “Cell
- 720 Migration in the Postembryonic Development of the Fish Lateral Line.” *Development*
- 721 *(Cambridge, England)* 129 (3): 605–15. <http://www.ncbi.nlm.nih.gov/pubmed/11830562>.
- 722 Schwob, James E, Woochan Jang, Eric H Holbrook, Brian Lin, Daniel B Herrick, Jesse N
- 723 Peterson, and Julie Hewitt Coleman. 2017. “Stem and Progenitor Cells of the Mammalian
- 724 Olfactory Epithelium: Taking Poietic License.” *The Journal of Comparative Neurology* 525
- 725 (4). NIH Public Access: 1034–54. doi:10.1002/cne.24105.
- 726 Shah, Arish N, Crystal F Davey, Alex C Whitebirch, Adam C Miller, and Cecilia B Moens.
- 727 2015. “Rapid Reverse Genetic Screening Using CRISPR in Zebrafish.” *Nature Methods* 12
- 728 (6). NIH Public Access: 535–40. doi:10.1038/nmeth.3360.
- 729 Tabor, Kathryn M, Sadie A Bergeron, Eric J Horstick, Diana C Jordan, Vilma Aho, Tarja
- 730 Porkka-Heiskanen, Gal Haspel, and Harold A Burgess. 2014. “Direct Activation of the
- 731 Mauthner Cell by Electric Field Pulses Drives Ultrarapid Escape Responses.” *Journal of*
- 732 *Neurophysiology* 112 (4). American Physiological Society: 834–44.
- 733 doi:10.1152/jn.00228.2014.
- 734 Taylor, G, M S Lehrer, P J Jensen, T T Sun, and R M Lavker. 2000. “Involvement of Follicular
- 735 Stem Cells in Forming Not Only the Follicle but Also the Epidermis.” *Cell* 102 (4): 451–61.
- 736 <http://www.ncbi.nlm.nih.gov/pubmed/10966107>.
- 737 Thomas, Eric D., Ivan A. Cruz, Dale W. Hailey, and David W. Raible. 2015. “There and Back
- 738 Again: Development and Regeneration of the Zebrafish Lateral Line System.” *Wiley*
- 739 *Interdisciplinary Reviews: Developmental Biology* 4 (1): 1–16. doi:10.1002/wdev.160.
- 740 Viader-Llargués, Oriol, Valerio Lupperger, Laura Pola-Morell, Carsten Marr, and Hernán
- 741 López-Schier. 2018. “Live Cell-Lineage Tracing and Machine Learning Reveal Patterns of
- 742 Organ Regeneration.” *ELife* 7 (March). doi:10.7554/eLife.30823.

- 743 Wada, Hironori, Christine Dambly-Chaudière, Koichi Kawakami, and Alain Ghysen. 2013.  
744 “Innervation Is Required for Sense Organ Development in the Lateral Line System of Adult  
745 Zebrafish.” *Proceedings of the National Academy of Sciences of the United States of*  
746 *America* 110 (14): 5659–64. doi:10.1073/pnas.1214004110.
- 747 Wada, Hironori, Alain Ghysen, Kazuhide Asakawa, Gembu Abe, Tohru Ishitani, and Koichi  
748 Kawakami. 2013. “Wnt/Dkk Negative Feedback Regulates Sensory Organ Size in  
749 Zebrafish.” *Current Biology* 23 (16). Cell Press: 1559–65. doi:10.1016/J.CUB.2013.06.035.
- 750 Wibowo, Indra, Filipe Pinto-Teixeira, Chie Satou, Shin-ichi Higashijima, and Hernán López-  
751 Schier. 2011. “Compartmentalized Notch Signaling Sustains Epithelial Mirror Symmetry.”  
752 *Development (Cambridge, England)* 138 (6): 1143–52. doi:10.1242/dev.060566.
- 753 Wiedenmann, J., S. Ivanchenko, F. Oswald, F. Schmitt, C. Rocker, A. Salih, K.-D. Spindler, and  
754 G. U. Nienhaus. 2004. “EosFP, a Fluorescent Marker Protein with UV-Inducible Green-to-  
755 Red Fluorescence Conversion.” *Proceedings of the National Academy of Sciences* 101 (45):  
756 15905–10. doi:10.1073/pnas.0403668101.
- 757 Williams, J. a., and N. Holder. 2000. “Cell Turnover in Neuromasts of Zebrafish Larvae.”  
758 *Hearing Research* 143 (1–2): 171–81. doi:10.1016/S0378-5955(00)00039-3.
- 759 Xiao, Tong, Tobias Roeser, Wendy Staub, Herwig Baier, C Nüsslein-Volhard, and F Bonhoeffer.  
760 2005. “A GFP-Based Genetic Screen Reveals Mutations That Disrupt the Architecture of  
761 the Zebrafish Retinotectal Projection.” *Development (Cambridge, England)* 132 (13). The  
762 Company of Biologists Ltd: 2955–67. doi:10.1242/dev.01861.
- 763 Yousefi, Maryam, Linheng Li, and Christopher J Lengner. 2017. “Hierarchy and Plasticity in the  
764 Intestinal Stem Cell Compartment.” *Trends in Cell Biology* 27 (10). NIH Public Access:  
765 753–64. doi:10.1016/j.tcb.2017.06.006.
- 766 Zhang, Qiuxiang, Suna Li, Hiu-Tung C. Wong, Xinyi J. He, Alisha Beirl, Ronald S. Petralia, Ya-  
767 Xian Wang, and Katie S. Kindt. 2018. “Synaptically Silent Sensory Hair Cells in Zebrafish  
768 Are Recruited after Damage.” *Nature Communications* 9 (1). Nature Publishing Group:  
769 1388. doi:10.1038/s41467-018-03806-8.
- 770

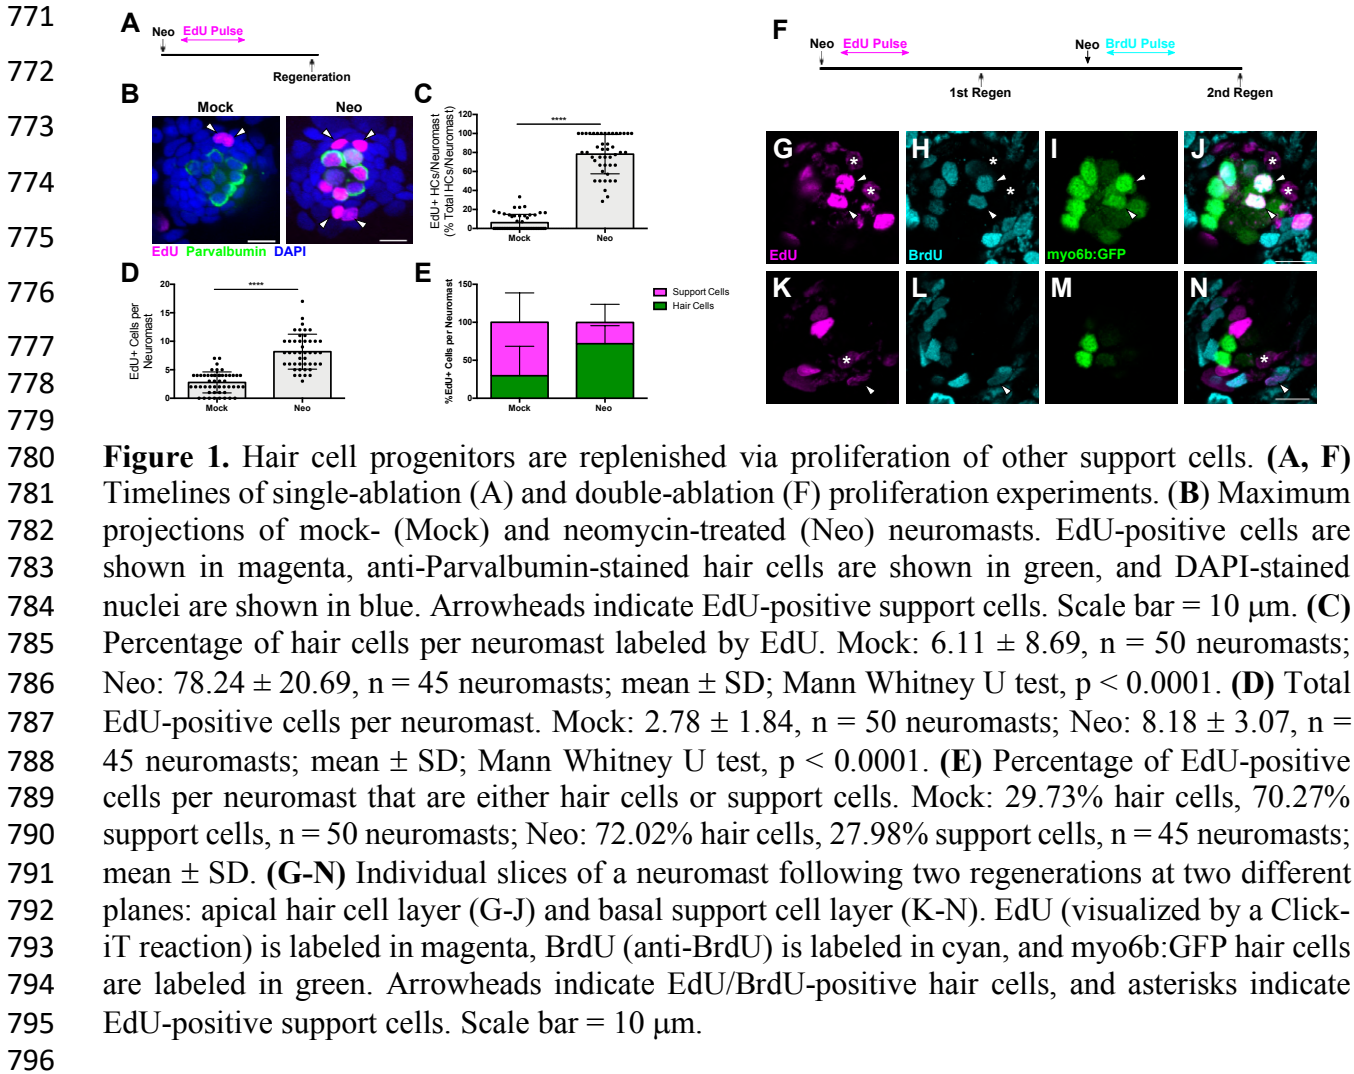



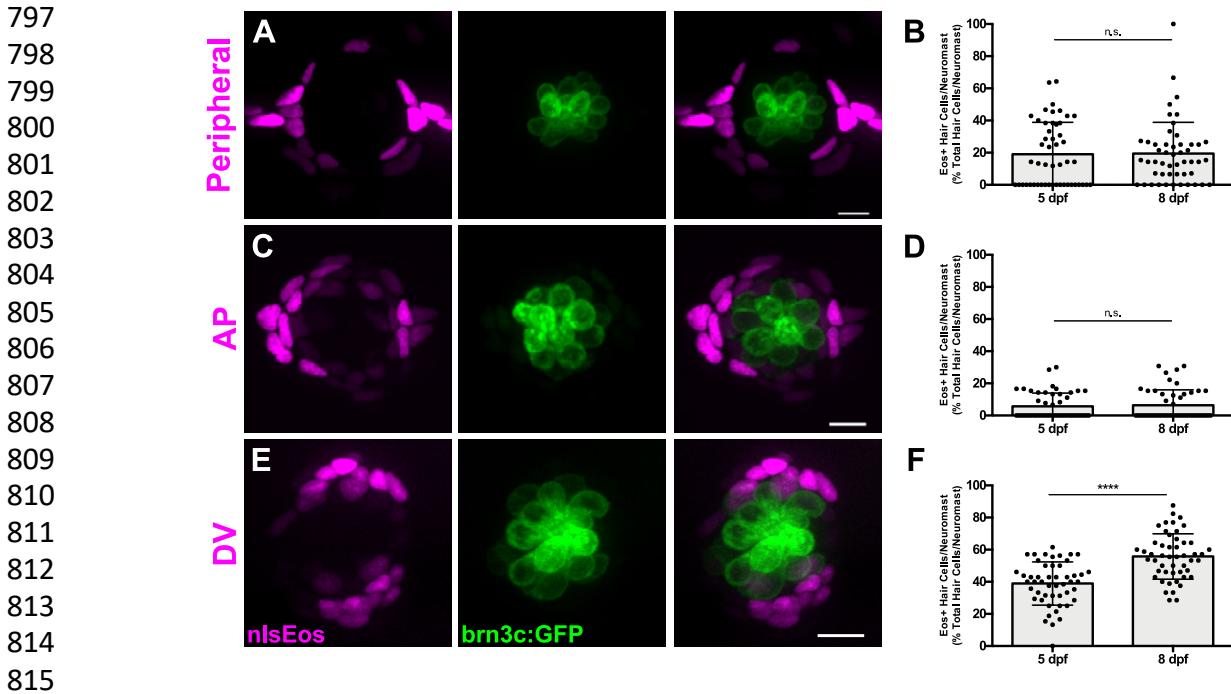

816 **Figure 2.** Genetic labeling of spatially-distinct support cell populations. **(A, C, E)** Maximum  
817 projections of neuromasts from *sfrp1a*:nlsEos (Peripheral, A), *tnfsf10l3*:nlsEos (AP, C), and  
818 *sost*:nlsEos (DV, E) fish. Converted nlsEos-positive cells are shown in magenta, and brn3c:GFP-  
819 positive hair cells are shown in green. Scale bar = 10  $\mu$ m. **(B, D, F)** Percentage of hair cells per  
820 neuromast labeled by Peripheral (B), AP (D), and DV cells (F) at 5 and 8 dpf. **(B)** 5 dpf:  $19.04 \pm$   
821  $19.86$ ,  $n = 50$  neuromasts; 8 dpf:  $19.46 \pm 19.44$ ,  $n = 50$  neuromasts; mean  $\pm$  SD; Mann Whitney U  
822 test,  $p = 0.7047$ . **(D)** 5 dpf:  $5.71 \pm 8.22$ ,  $n = 50$  neuromasts; 8 dpf:  $6.36 \pm 9.57$ ,  $n = 50$  neuromasts;  
823 mean  $\pm$  SD; Mann Whitney U test,  $p = 0.9668$ . **(F)** 5 dpf:  $38.93 \pm 13.46$ ,  $n = 50$  neuromasts; 8 dpf:  
824  $55.78 \pm 14.13$ ,  $n = 50$  neuromasts; mean  $\pm$  SD; Mann Whitney U test,  $p < 0.0001$ .  
825

826  
827  
828  
829  
830  
831  
832  
833  
834  
835  
836  
837  
838  
839  
840  
841  
842  
843  
844  
845  
846  
847  
848  
849  
850  
851  
852  
853  
854  
855  
856  
857  
858  
859  
860  
861  
862  
863  
864  
865  
866

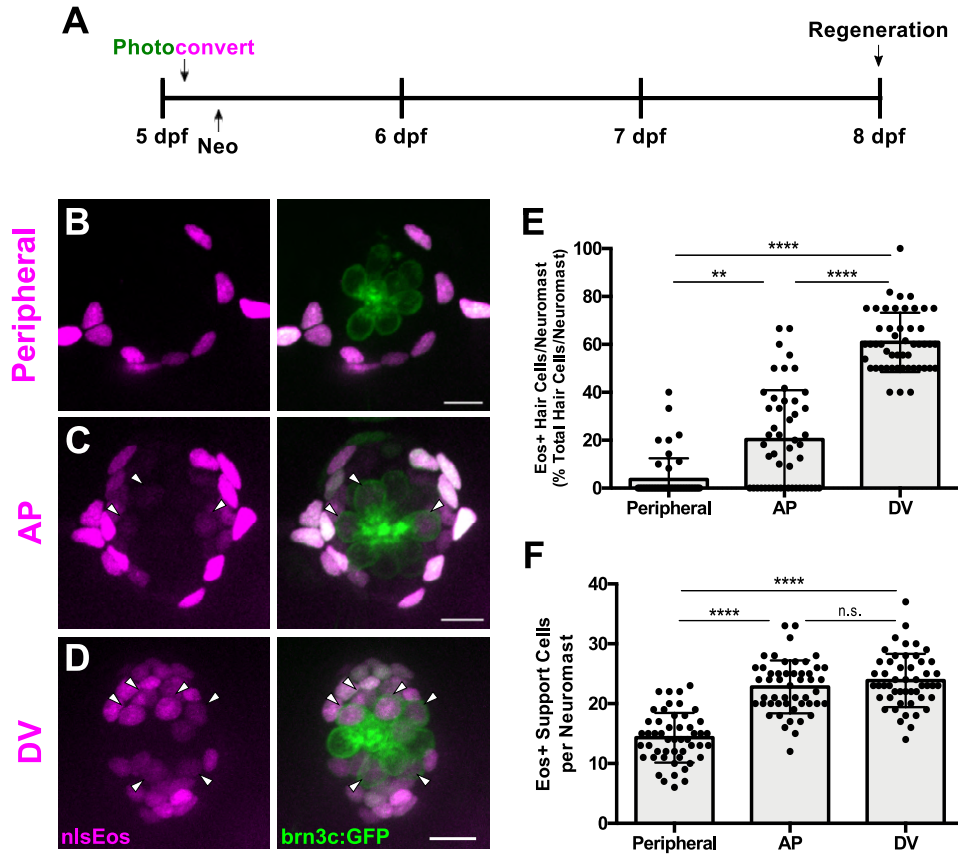

**Figure 3.** Distinct support cell populations have different regenerative capacities. **(A)** Timeline of nlsEos fate mapping experiment. Fish were photoconverted at 5 dpf, treated with neomycin, then fixed and imaged 72 hours post treatment (8 dpf). **(B, C, D)** Maximum projections of neuromasts from *Sfrp1a*:nlsEos (Peripheral, B), *tnfsf10l3*:nlsEos (AP, C), and *sost*:nlsEos (DV, D) fish following photoconversion and hair cell regeneration. Converted nlsEos-positive cells are shown in magenta, and brn3c:GFP-positive hair cells are shown in green. Arrowheads indicate nlsEos-positive hair cells. Scale bar = 10 μm. **(E)** Percentage of hair cells per neuromast labeled by nlsEos following regeneration. *Sfrp1a*:nlsEos (Peripheral):  $3.59 \pm 8.87$ ,  $n = 50$  neuromasts; *tnfsf10l3*:nlsEos (AP):  $20.28 \pm 20.58$ ,  $n = 50$  neuromasts; *sost*:nlsEos (DV):  $60.87 \pm 12.37$ ,  $n = 50$  neuromasts; mean  $\pm$  SD; Kruskal-Wallis test, Dunn's post-test,  $p = 0.003$  (Peripheral vs. AP),  $p < 0.0001$  (Peripheral vs. DV, AP vs. DV). **(F)** Total nlsEos-positive support cells per neuromast prior to hair cell ablation. *Sfrp1a*:nlsEos (Peripheral):  $14.30 \pm 4.17$ ,  $n = 50$  neuromasts; *tnfsf10l3*:nlsEos (AP):  $22.8 \pm 4.40$ ,  $n = 50$  neuromasts; *sost*:nlsEos (DV):  $23.86 \pm 4.45$ ,  $n = 50$  neuromasts; mean  $\pm$  SD; Kruskal-Wallis test, Dunn's post-test,  $p < 0.0001$  (Peripheral vs. AP, Peripheral vs. DV),  $p > 0.9999$  (AP vs. DV).

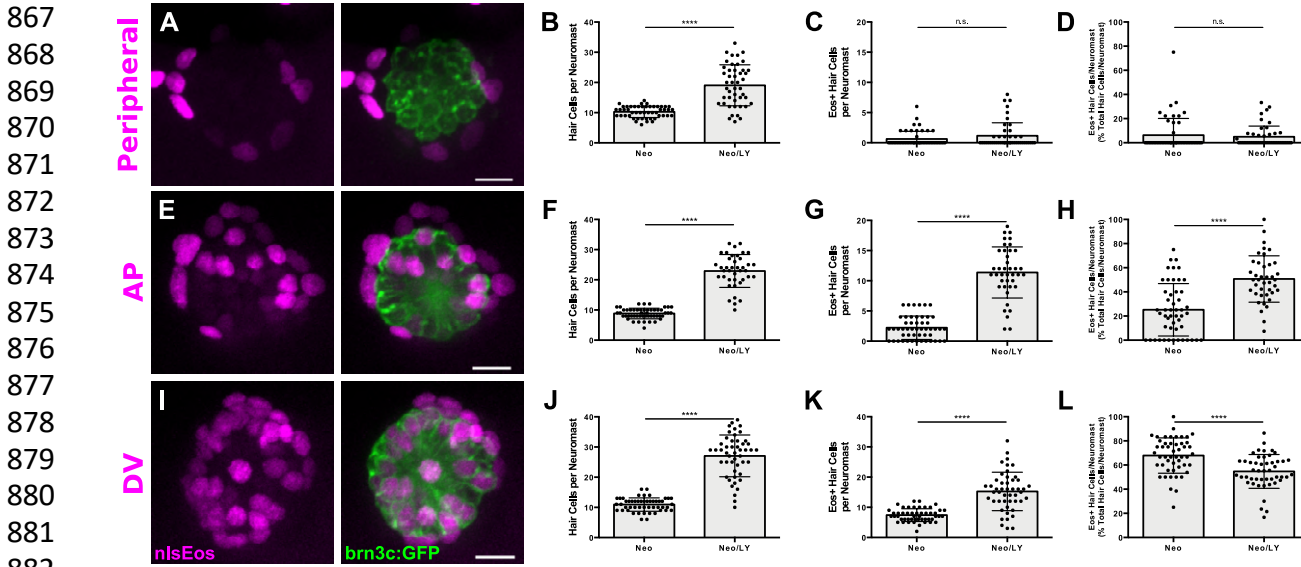

**Figure 4.** Notch signaling differentially regulates support cell populations. (A, E, I) Maximum projections of neuromasts expressing *sfrp1a*:nlsEos (Peripheral, A), *tnfsf10l3*:nlsEos (AP, E), and *sost*:nlsEos (DV, I) following Notch-inhibited hair cell regeneration. Converted nlsEos-positive cells are shown in magenta, and *brn3c*:GFP-positive hair cells are shown in green. Scale bar = 10  $\mu$ m. (B) Total number of hair cells per neuromast in *sfrp1a*:nlsEos fish following hair cell regeneration. Neo:  $10.28 \pm 1.88$ ,  $n = 50$  neuromasts; Neo/LY:  $19.07 \pm 6.79$ ,  $n = 46$  neuromasts; mean  $\pm$  SD; Mann Whitney U test,  $p < 0.0001$ . (C) *Sfrp1a*:nlsEos-positive hair cells per neuromast following hair cell regeneration. Neo:  $0.62 \pm 1.28$ ,  $n = 50$  neuromasts; Neo/LY:  $1.15 \pm 2.16$ ,  $n = 46$  neuromasts; mean  $\pm$  SD; Mann Whitney U test,  $p = 0.2481$ . (D) Percentage of *sfrp1a*:nlsEos-labeled hair cells per neuromast following hair cell regeneration. Neo:  $6.31 \pm 13.83$ ,  $n = 50$  neuromasts; Neo/LY:  $4.95 \pm 8.82$ ,  $n = 46$  neuromasts; mean  $\pm$  SD; Mann Whitney U test,  $p = 0.5148$ . (F) Total number of hair cells per neuromast in *tnfsf10l3*:nlsEos fish following hair cell regeneration. Neo:  $8.84 \pm 1.75$ ,  $n = 50$  neuromasts; Neo/LY:  $22.93 \pm 5.45$ ,  $n = 40$  neuromasts; mean  $\pm$  SD; Mann Whitney U test,  $p < 0.0001$ . (G) *Tnfsf10l3*:nlsEos-positive hair cells per neuromast following hair cell regeneration. Neo:  $2.22 \pm 1.94$ ,  $n = 50$  neuromasts; Neo/LY:  $11.38 \pm 4.23$ ,  $n = 40$  neuromasts; mean  $\pm$  SD; Mann Whitney U test,  $p < 0.0001$ . (H) Percentage of *tnfsf10l3*:nlsEos-labeled hair cells per neuromast following hair cell regeneration. Neo:  $25.19 \pm 21.72$ ,  $n = 50$  neuromasts; Neo/LY:  $50.68 \pm 19.23$ ,  $n = 40$  neuromasts; mean  $\pm$  SD; Mann Whitney U test,  $p < 0.0001$ . (J) Total number of hair cells per neuromast in *sost*:nlsEos fish following hair cell regeneration. Neo:  $10.94 \pm 2.23$ ,  $n = 50$  neuromasts; Neo/LY:  $27.06 \pm 6.90$ ,  $n = 48$  neuromasts; mean  $\pm$  SD; Mann Whitney U test,  $p < 0.0001$ . (K) *Sost*:nlsEos-positive hair cells per neuromast following hair cell regeneration. Neo:  $7.40 \pm 2.13$ ,  $n = 50$  neuromasts; Neo/LY:  $15.25 \pm 6.36$ ,  $n = 48$  neuromasts; mean  $\pm$  SD; Mann Whitney U test,  $p < 0.0001$ . (L) Percentage of *sost*:nlsEos-labeled hair cells per neuromast following hair cell regeneration. Neo:  $67.86 \pm 14.63$ ,  $n = 50$  neuromasts; Neo/LY:  $54.69 \pm 14.01$ ,  $n = 48$  neuromasts; mean  $\pm$  SD; Mann Whitney U test,  $p < 0.0001$ .

909

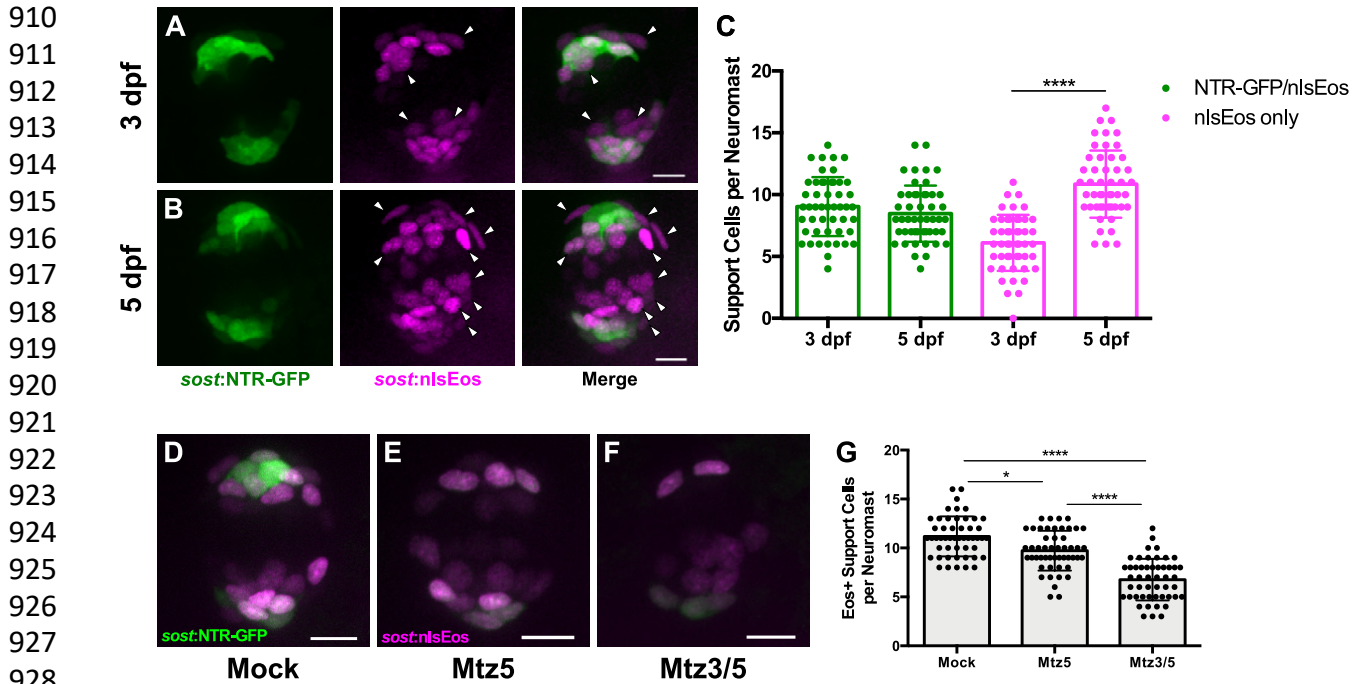

910  
911  
912  
913  
914  
915  
916  
917  
918  
919  
920  
921  
922  
923  
924  
925  
926  
927  
928  
929 **Figure 5.** Differences in overlap between *sost:NTR-GFP* and *sost:nlsEos* populations. **(A-B)**  
930 Maximum projections of neuromasts from *sost:NTR-GFP*; *sost:nlsEos* fish at 3 dpf (A) and 5 dpf  
931 (B). *Sost:NTR-GFP* cells are shown in green and *sost:nlsEos* cells are shown in magenta.  
932 Arrowheads indicate cells expressing *sost:nlsEos* but not *sost:NTR-GFP*. Scale bar = 10  $\mu$ m. **(C)**  
933 Support cells per neuromast expressing either NTR-GFP and nlsEos (green) or nlsEos only  
934 (magenta) at 3 dpf and 5 dpf. NTR-GFP/nlsEos:  $9.04 \pm 2.39$  (3 dpf) vs.  $8.47 \pm 2.27$  (5 dpf),  $n = 49$   
935 neuromasts; nlsEos only:  $6.10 \pm 2.27$  (3 dpf) vs.  $10.86 \pm 2.72$  (5 dpf),  $n = 49$  neuromasts; mean  $\pm$   
936 SD; Kruskal-Wallis test, Dunn's post-test,  $p > 0.9999$  (NTR-GFP/nlsEos 3 dpf vs. 5 dpf),  $p <$   
937  $0.0001$  (nlsEos only 3 dpf vs. 5 dpf). **(D-F)** Maximum projections of neuromasts from *sost:NTR-*  
938 *GFP*; *sost:nlsEos* fish following mock treatment (D; Mock), Mtz at 5 dpf (E; Mtz5), and Mtz at 3  
939 dpf and 5 dpf (F; Mtz3/5). *Sost:NTR-GFP* cells are shown in green and *sost:nlsEos* cells are shown  
940 in magenta. Scale bar = 10  $\mu$ m. **(G)** Support cells per neuromast solely expressing *sost:nlsEos*  
941 following Mtz treatment. Mock:  $11.18 \pm 2.04$ ,  $n = 50$  neuromasts; Mtz5:  $9.72 \pm 2.03$ ,  $n = 50$   
942 neuromasts; Mtz3/5:  $6.76 \pm 2.12$ ,  $n = 50$  neuromasts; mean  $\pm$  SD; Kruskal-Wallis test, Dunn's  
943 post-test,  $p = 0.0288$  (Mock vs. Mtz5),  $p < 0.0001$  (Mock vs. Mtz3/5, Mtz5 vs. Mtz3/5).  
944



945  
946  
947  
948  
949  
950  
951  
952  
953  
954  
955  
956  
957  
958  
959  
960  
961  
962  
963  
964  
965  
966  
967  
968  
969  
970  
971  
972  
973  
974  
975  
976  
977  
978  
979  
980  
981  
982  
983  
984

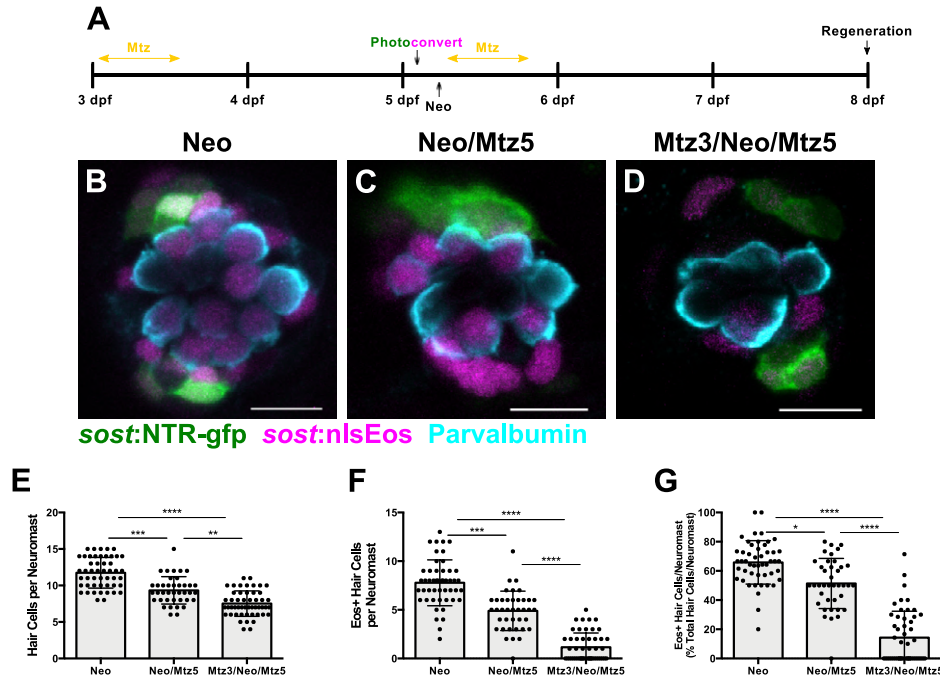

**Figure 6.** Ablation of DV cells decreases number of regenerated hair cells. **(A)** Timeline of DV cell-ablation experiment. Larvae were treated with Mtz at 3 dpf, photoconverted, then treated with neomycin, then treated with Mtz again at 5 dpf, and fixed and immunostained at 72 hpt (8 dpf). **(B-D)** Maximum projections of neuromasts from *sost:NTR-GFP*; *sost:nlsEos* fish following neomycin (B; Neo), neomycin and Mtz (C; Neo/Mtz5), and Mtz, neomycin, and Mtz treatments (D; Mtz3/Neo/Mtz5). *Sost:NTR-GFP* cells are shown in green, *sost:nlsEos* cells are shown in magenta, and anti-Parvalbumin-stained hair cells are shown in cyan. Scale bar = 10  $\mu$ m. **(E)** Total hair cells per neuromast following regeneration. Neo: 11.73  $\pm$  2.10, n = 49 neuromasts; Neo/Mtz5: 9.33  $\pm$  1.88, n = 39 neuromasts; Mtz3/Neo/Mtz5: 7.52  $\pm$  1.74, n = 50 neuromasts; mean  $\pm$  SD; Kruskal-Wallis test, Dunn's post-test, p = 0.0001 (Neo vs. Neo/Mtz5), p < 0.0001 (Neo vs. Mtz3/Neo/Mtz5), p = 0.0016 (Neo/Mtz5 vs. Mtz3/Neo/Mtz5). **(F)** *Sost:nlsEos*-positive hair cells per neuromast following regeneration. Neo: 7.78  $\pm$  2.36, n = 49 neuromasts; Neo/Mtz5: 4.90  $\pm$  2.02, n = 39 neuromasts; Mtz3/Neo/Mtz5: 1.16  $\pm$  1.46, n = 50 neuromasts; mean  $\pm$  SD; Kruskal-Wallis test, Dunn's post-test, p = 0.0003 (Neo vs. Neo/Mtz5), p < 0.0001 (Neo vs. Mtz3/Neo/Mtz5, Neo/Mtz5 vs. Mtz3/Neo/Mtz5). **(G)** Percentage of hair cells per neuromast labeled by *sost:nlsEos* following regeneration. Neo: 65.81  $\pm$  14.89, n = 49 neuromasts; Neo/Mtz5: 51.40  $\pm$  17.17, n = 39 neuromasts; Mtz3/Neo/Mtz5: 14.29  $\pm$  18.10, n = 50 neuromasts; mean  $\pm$  SD; Kruskal-Wallis test, Dunn's post-test, p = 0.0147 (Neo vs. Neo/Mtz5), p < 0.0001 (Neo vs. Mtz3/Neo/Mtz5, Neo/Mtz5 vs. Mtz3/Neo/Mtz5).

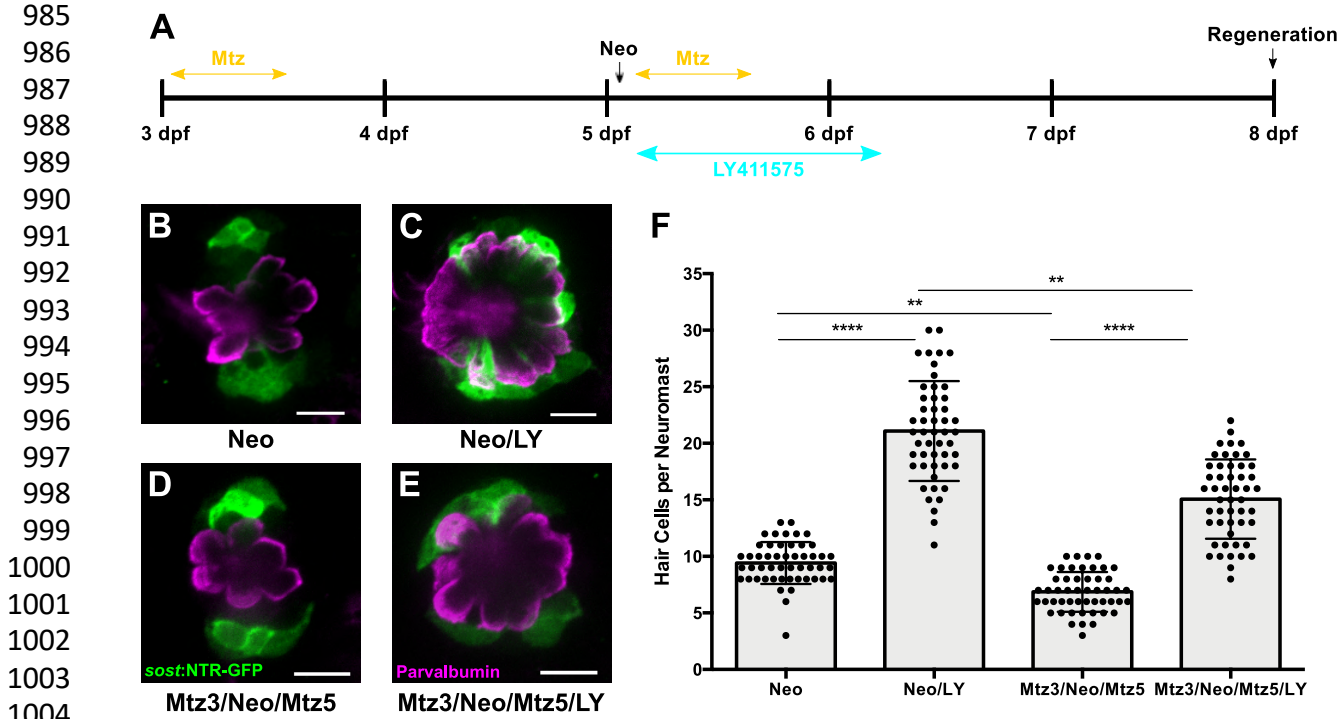

1005 **Figure 7.** DV cell-ablation reduces the number of supernumerary hair cells formed during Notch-  
1006 inhibited hair cell regeneration. **(A)** Timeline of dual DV cell-ablation, Notch-inhibition  
1007 experiment. *Sosl:NTR-GFP* larvae were treated with Mtz at 3 dpf, treated with neomycin at 5dpf,  
1008 then co-treated with Mtz and LY411575 for 8 hours, then washed out and treated with LY411575  
1009 for 16 additional hours (24 hours total LY). **(B-E)** Maximum projections of *sosl:NTR-GFP*  
1010 neuromasts following normal hair cell regeneration (B; Neo), Notch-inhibited hair cell  
1011 regeneration (C; Neo/LY), DV cell-ablated hair cell regeneration (D; Mtz3/Neo/Mtz5), and DV  
1012 cell-ablated and Notch-inhibited hair cell regeneration (E; Mtz3/Neo/Mtz5/LY). *Sosl:NTR-GFP*  
1013 cells are shown in green, and anti-Parvalbumin immunostained hair cells are shown in magenta.  
1014 Scale bar = 10  $\mu$ m. **(F)** Total number of hair cells per neuromast following hair cell regeneration.  
1015 Neo:  $9.42 \pm 1.85$ , n = 50 neuromasts; Neo/LY:  $21.08 \pm 4.42$ , n = 50 neuromasts; Mtz3/Neo/Mtz5:  
1016  $6.86 \pm 1.76$ , n = 50 neuromasts; Mtz3/Neo/Mtz5/LY:  $15.06 \pm 3.51$ , n = 50 neuromasts; mean  $\pm$   
1017 SD; Kruskal-Wallis test, Dunn's post-test, p < 0.0001 (Neo vs. Neo/LY; Mtz3/Neo/Mtz5 vs.  
1018 Mtz3/Neo/Mtz5/LY), p = 0.0058 (Neo vs. Mtz3/Neo/Mtz5), p = 0.0029 (Neo/LY vs.  
1019 Mtz3/Neo/Mtz5/LY).

1020



1021  
1022  
1023  
1024  
1025  
1026  
1027  
1028  
1029  
1030  
1031  
1032  
1033  
1034  
1035  
1036  
1037  
1038  
1039  
1040  
1041  
1042  
1043  
1044  
1045  
1046  
1047  
1048  
1049  
1050  
1051  
1052  
1053

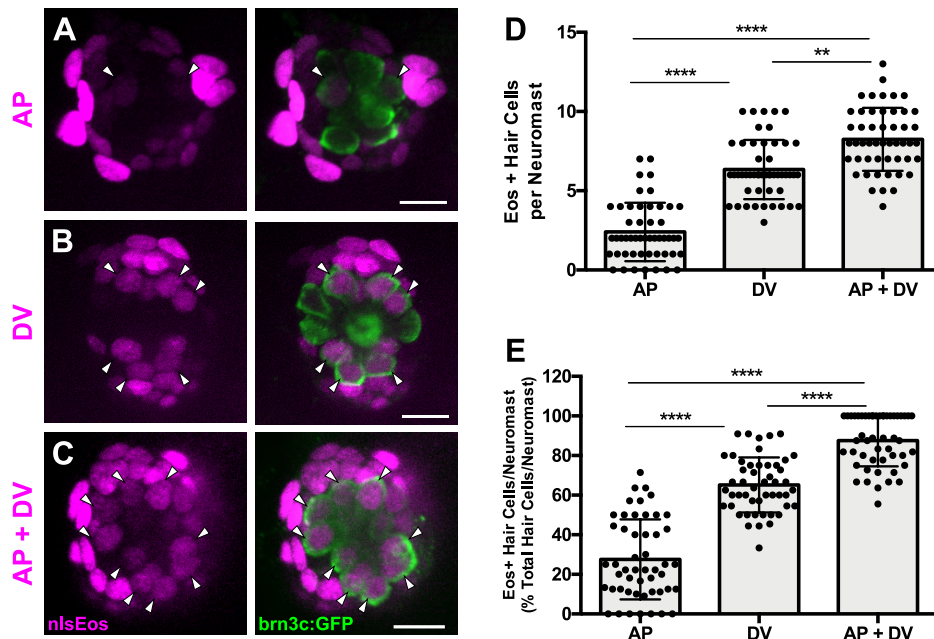

**Figure 8.** AP cells and DV cells define separate progenitor populations. (A-C) Maximum projections of neuromasts from *tnfsf1013:nlsEos* (AP, A), *sost:nlsEos* (DV, B), and *tnfsf1013:nlsEos/sost:nlsEos* fish (AP + DV, C) following photoconversion and regeneration. Converted nlsEos-positive cells are shown in magenta, and brn3c:GFP-positive hair cells are shown in green. Arrowheads indicate nlsEos-positive hair cells. Scale bar = 10  $\mu$ m. (D) Number of nlsEos-positive hair cells per neuromast in each of the nlsEos lines following regeneration. *Tnfsf1013:nlsEos* (AP):  $2.4 \pm 1.84$ ,  $n = 50$  neuromasts; *sost:nlsEos* (DV):  $6.34 \pm 1.87$ ,  $n = 50$  neuromasts; *tnfsf1013:nlsEos/sost:nlsEos* (AP + DV):  $8.24 \pm 1.99$ ,  $n = 50$  neuromasts; mean  $\pm$  SD; Kruskal-Wallis test, Dunn's post-test,  $p < 0.0001$  (AP vs. DV, AP vs. AP + DV),  $p = 0.0031$  (DV vs. AP + DV). (E) Percentage of hair cells per neuromast labeled by nlsEos lines following regeneration. AP:  $27.59 \pm 20.21$ ,  $n = 50$  neuromasts; DV:  $65.16 \pm 13.89$ ,  $n = 50$  neuromasts; AP + DV:  $87.57 \pm 13.02$ ,  $n = 50$  neuromasts; mean  $\pm$  SD; Kruskal-Wallis test, Dunn's post-test,  $p < 0.0001$  (all comparisons).

1054  
1055  
1056  
1057  
1058  
1059  
1060  
1061  
1062  
1063  
1064  
1065  
1066  
1067  
1068  
1069  
1070  
1071  
1072  
1073  
1074  
1075  
1076  
1077  
1078  
1079  
1080  
1081

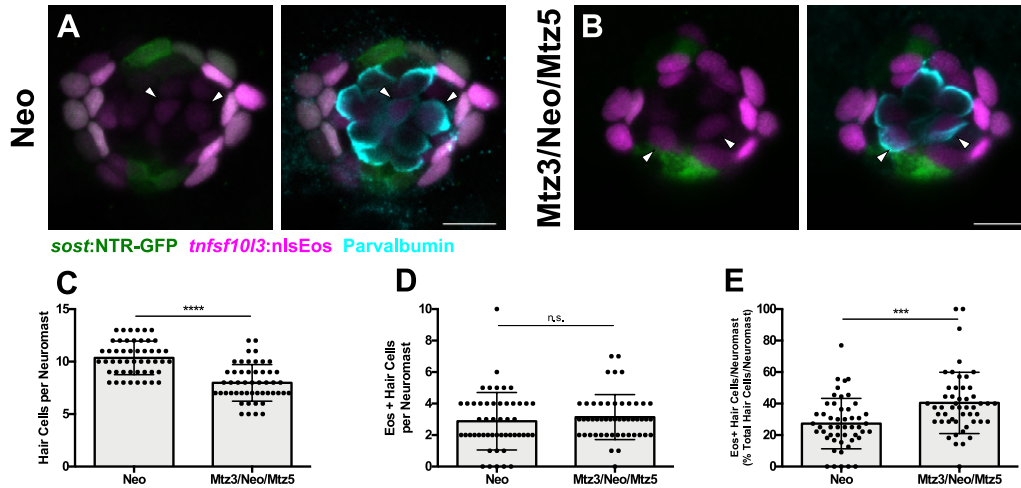

**Figure 9.** AP population doesn't compensate for the loss of the DV population during hair cell regeneration. **(A-B)** Maximum projections of *tnfsf10l3:nlsEos*; *sost:NTR-GFP* neuromasts following normal hair cell regeneration (A; Neo) or DV cell-ablated hair cell regeneration (B; Mtz3/Neo/Mtz5). *Sost:NTR-GFP* cells are shown in green, *tnfsf10l3:nlsEos* cells are shown in magenta, and anti-Parvalbumin-stained hair cells are shown in cyan. Arrowheads indicate nlsEos-positive hair cells. Scale bar = 10  $\mu$ m. **(C)** Total number of hair cells per neuromast following hair cell regeneration. Neo:  $10.36 \pm 1.60$ ,  $n = 50$  neuromasts; Mtz3/Neo/Mtz5:  $7.98 \pm 1.74$ ,  $n = 50$  neuromasts; mean  $\pm$  SD; Mann Whitney U test,  $p < 0.0001$ . **(D)** Number of nlsEos-positive hair cells per neuromast following hair cell regeneration. Neo:  $2.88 \pm 1.83$ ,  $n = 50$  neuromasts; Mtz3/Neo/Mtz5:  $3.14 \pm 1.43$ ,  $n = 50$  neuromasts; mean  $\pm$  SD; Mann Whitney U test,  $p = 0.3855$ . **(E)** Percentage of hair cells per neuromast labeled by nlsEos following hair cell regeneration. Neo:  $27.26 \pm 16.00$ ,  $n = 50$  neuromasts; Mtz3/Neo/Mtz5:  $40.43 \pm 19.44$ ,  $n = 50$  neuromasts; mean  $\pm$  SD; Mann Whitney U test,  $p = 0.0002$ .

1082  
1083  
1084  
1085  
1086  
1087  
1088  
1089  
1090  
1091  
1092  
1093  
1094  
1095  
1096  
1097  
1098  
1099  
1100  
1101  
1102  
1103  
1104  
1105  
1106  
1107

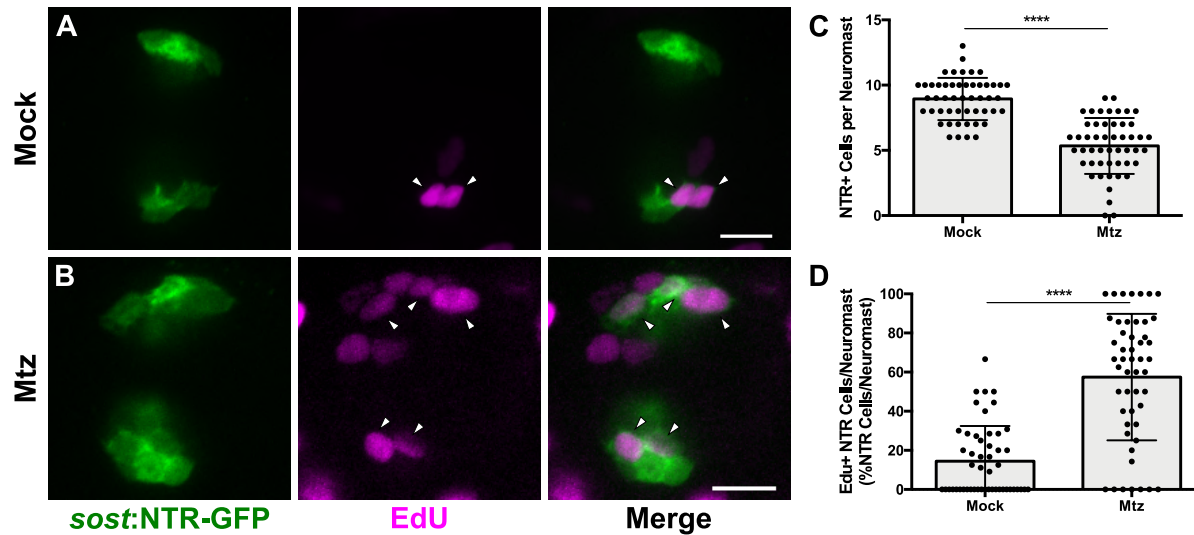

**Figure 10.** DV population regenerates via proliferation. **(A-B)** Maximum projections of neuromasts from *sost:NTR-GFP* fish either untreated (A; Mock) or treated with 10 mM Mtz (B; Mtz). *Sost:NTR-GFP* cells are shown in green and EdU-positive cells are shown in magenta. Arrowheads indicate EdU-positive *sost:NTR-GFP* cells. Scale bar = 10 μm. **(C)** Total number of *sost:NTR-GFP* cells per neuromast following DV cell regeneration. Mock:  $8.94 \pm 1.62$ , n = 50 neuromasts; Mtz:  $5.34 \pm 2.14$ , n = 50 neuromasts; mean ± SD; Mann Whitney U test, p < 0.0001. **(D)** Percentage of *sost:NTR-GFP* cells per neuromast labeled by EdU following DV cell regeneration. Mock:  $14.47 \pm 17.95$ , n = 50 neuromasts; Mtz:  $57.49 \pm 32.34$ , n = 50 neuromasts; mean ± SD; Mann Whitney U test, p < 0.0001.

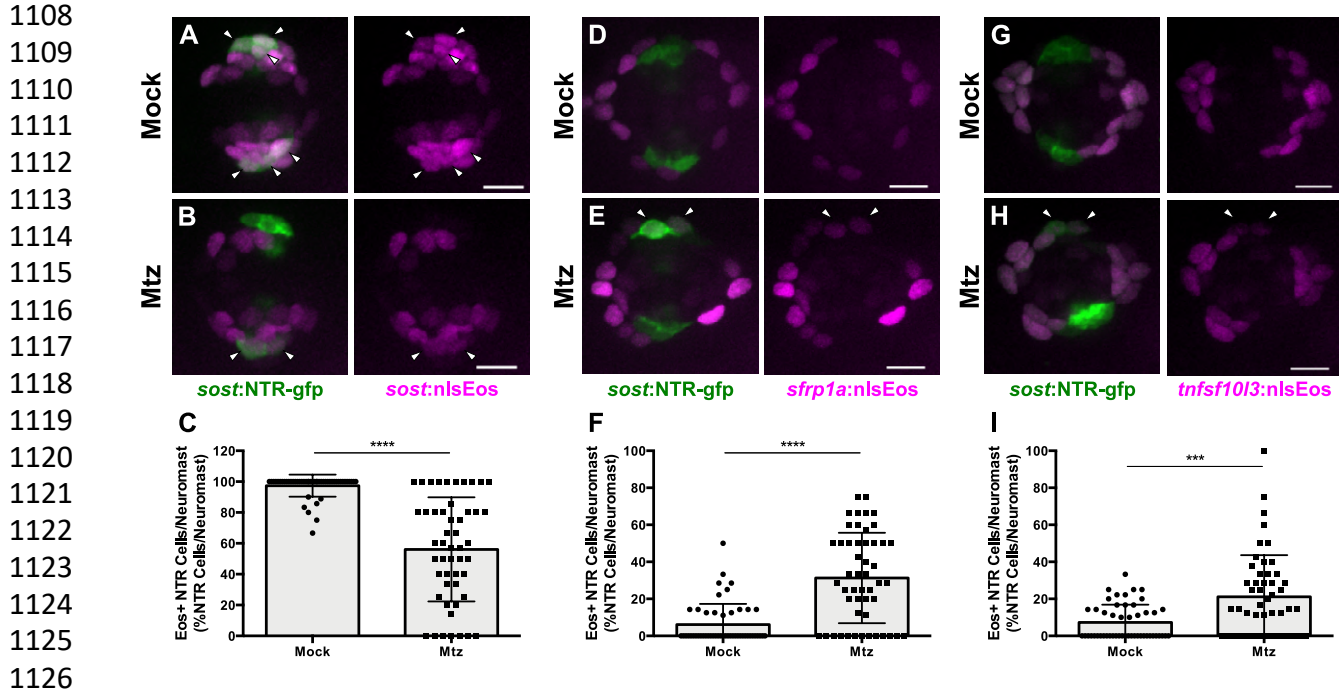

1127 **Figure 11.** DV cells are replenished by other support cell populations. (A-B, D-E, G-H) Maximum  
1128 projections of neuromasts expressing *sost:NTR-GFP* and *sost:nlsEos* (A-B), *sfrp1a:nlsEos* (D-E),  
1129 and *tnfsf10l3:nlsEos* (G-H) in the absence of (A, D, G; Mock) or following Mtz-induced DV cell  
1130 ablation (B, E, H; Mtz). *Sost:NTR-GFP* cells are shown in green and *nlsEos*-positive cells are  
1131 shown in magenta. Arrowheads indicate *nlsEos*-positive *sost:NTR-GFP* cells. Scale bar = 10  $\mu$ m.  
1132 (C) Percentage of *sost:NTR-GFP* cells per neuromast labeled by *sost:nlsEos* following DV cell  
1133 regeneration. Mock:  $97.39 \pm 7.14$ , n = 50 neuromasts; Mtz:  $56.09 \pm 33.72$ , n = 50 neuromasts;  
1134 mean  $\pm$  SD; Mann Whitney U test, p < 0.0001. (F) Percentage of *sost:NTR-GFP* cells per  
1135 neuromast labeled by *sfrp1a:nlsEos* following DV cell regeneration. Mock:  $6.15 \pm 11.14$ , n = 50  
1136 neuromasts; Mtz:  $31.27 \pm 24.41$ , n = 50 neuromasts; mean  $\pm$  SD; Mann Whitney U test, p < 0.0001.  
1137 (I) Percentage of *sost:NTR-GFP* cells per neuromast labeled by *tnfsf10l3:nlsEos* following DV  
1138 cell regeneration. Mock:  $7.31 \pm 9.55$ , n = 50 neuromasts; Mtz:  $21.11 \pm 22.51$ , n = 50 neuromasts;  
1139 mean  $\pm$  SD; Mann Whitney U test, p = 0.0004.  
1140

1141  
1142  
1143  
1144  
1145  
1146  
1147  
1148  
1149  
1150  
1151  
1152  
1153  
1154  
1155  
1156  
1157  
1158  
1159  
1160  
1161  
1162  
1163  
1164  
1165  
1166  
1167  
1168  
1169  
1170  
1171  
1172  
1173

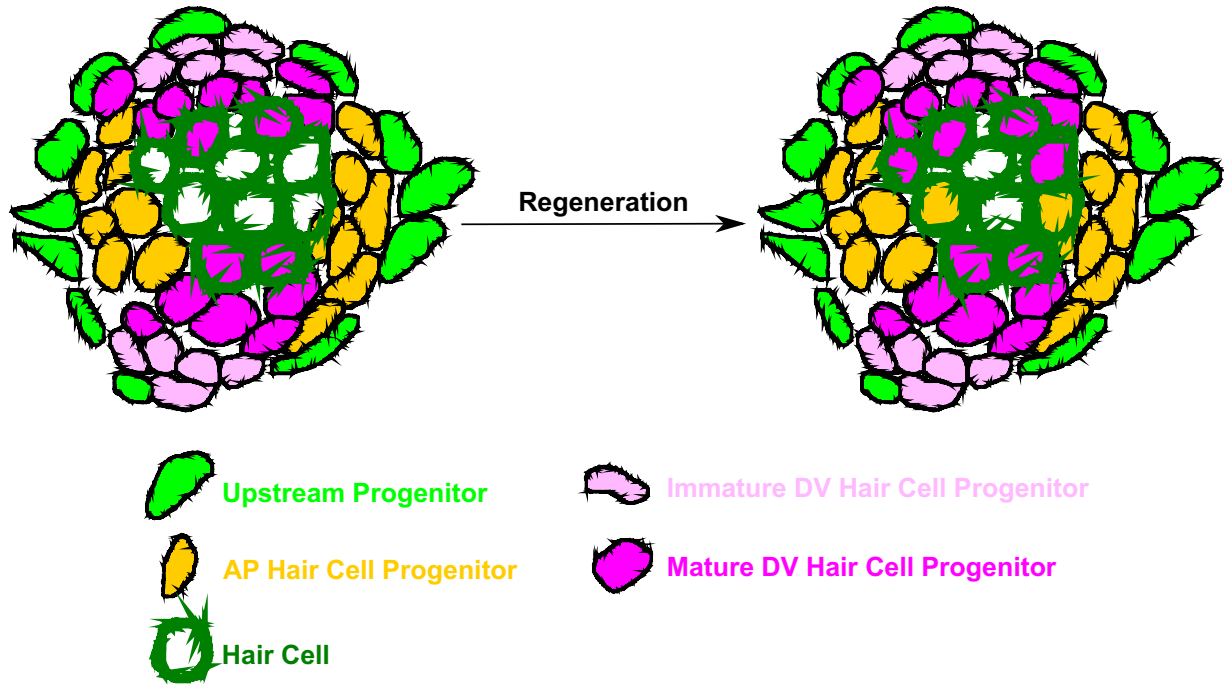

**Figure 12.** Model of neuromast progenitor identity. *Sost:nlsEos*-positive cells, located in the dorsoventral (DV) region of the neuromast, contain immature hair cell progenitors (shown in light pink) and mature hair cell progenitors (shown in magenta). Immature hair cell progenitors do not directly generate new hair cells (outlined in dark green) during regeneration, but do become mature hair cell progenitors, which comprise the majority of hair cell progenitors (see magenta-filled hair cells following regeneration). *Tnfsf10l3:nlsEos*-positive cells (shown in gold), located in the anteroposterior (AP) region of the neuromast, also serve as hair cell progenitors (see gold-filled hair cells following regeneration). Both of these populations are regulated by Notch signaling, and both can replenish immature hair cell progenitors. Finally, *sfrp1a:nlsEos*-positive cells (shown in light green), located in the periphery, do not serve as hair cell progenitors, nor are they regulated by Notch signaling. However, they are capable of replenishing immature hair cell progenitors, and can thus be classified as an upstream progenitor.



1174  
1175  
1176  
1177  
1178  
1179  
1180  
1181  
1182  
1183  
1184  
1185  
1186  
1187  
1188  
1189  
1190  
1191  
1192  
1193  
1194  
1195  
1196  
1197  
1198  
1199  
1200  
1201  
1202

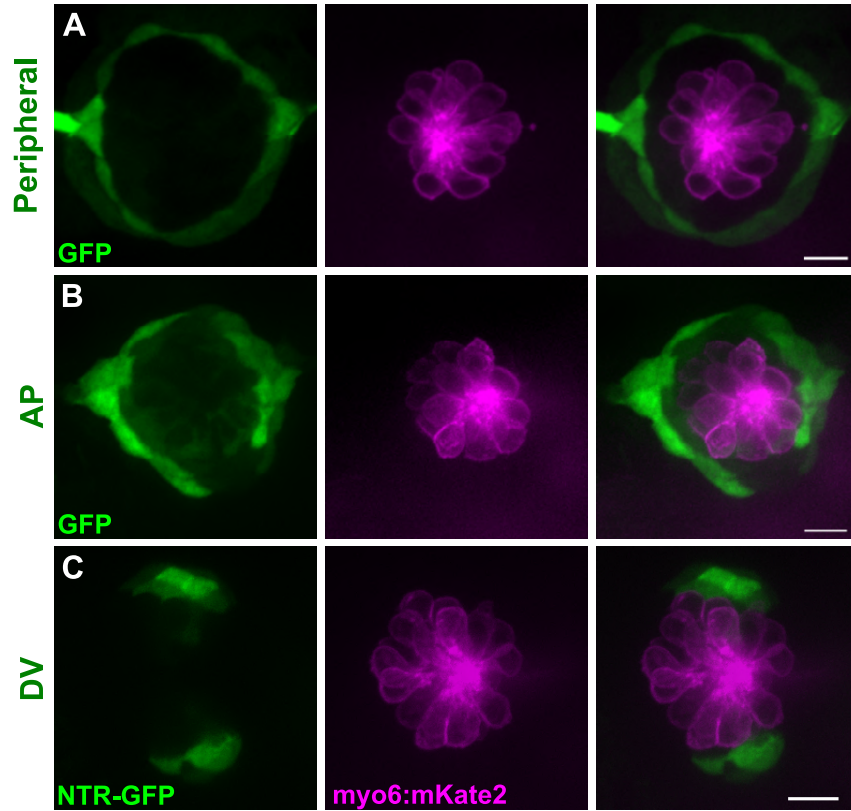

**Figure 2 – figure supplement 1.** Support cell transgenes are not expressed in hair cells. (A-C) Maximum projections of neuromasts from *Tg[sfrpla:GFP]<sup>w222</sup>* (Peripheral, A), *Tg[tnfsf10l3:GFP]<sup>w223</sup>* (AV, B), and *sost:NTR-GFP* (DV, C) fish. GFP-positive cells are shown in green, and hair cells are shown in magenta via *myo6:mKate2*. In all three populations, there is no GFP expression in hair cells. Scale bar = 10  $\mu$ m.



1203  
1204  
1205  
1206  
1207  
1208  
1209  
1210  
1211  
1212

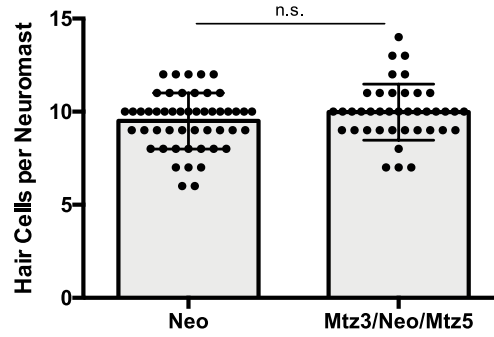

1213 **Figure 6 – figure supplement 1.** Mtz treatment does not inherently impact hair cell regeneration.  
1214 Total number of hair cells per neuromast following regular hair cell regeneration (Neo) or DV cell-  
1215 ablated regeneration (Mtz3/Neo/Mtz5) in non-transgenic siblings of *sost:NTR-GFP* fish. Neo:  $9.5$   
1216  $\pm 1.50$ ,  $n = 50$  neuromasts; Mtz3/Neo/Mtz5:  $9.98 \pm 1.51$ ,  $n = 40$  neuromasts; mean  $\pm$  SD; Mann  
1217 Whitney U test,  $p = 0.2317$ .
